# 1    **The cerebellar clock: predicting and** 2    **timing somatosensory touch**

3    Lau M. Andersen<sup>1,2\*</sup> & Sarang S. Dalal<sup>1</sup>

<sup>1</sup> Center of Functionally Integrative Neuroscience (CFIN), Aarhus University, Nørrebrogade 44, Building 1A, 8000 Aarhus C, Denmark

<sup>2</sup> National Facility for Magnetoencephalography (NatMEG), Karolinska Institutet, Nobels väg 9, 171 77 Stockholm, Sweden

\* Corresponding author

Email: [lmandersen@cfin.au.dk](mailto:lmandersen@cfin.au.dk)

## 0 Abstract

Humans are adept at predicting what will happen next and when precisely it will occur. An activity as everyday as walking at a steady pace through a busy city while talking to a friend can only happen as smoothly as it does because the human brain has predicted most of the sensory feedback it will receive. It is only when the sensory feedback does not match what was expected, say, a sudden slippery spot on the pavement, that one becomes aware of the sensory feedback. The cerebellum is known to be involved in these predictions, but not much is known about the precise timing of them due to the scarcity of time-sensitive cerebellar neuroimaging studies, such as ones conducted with magnetoencephalography.

We here investigated the timing of sensory expectations as they are expressed in the cerebellum using magnetoencephalography. We did this by comparing the cerebellum's response to somatosensory omissions from regular trains of stimulation to its response to omissions from irregular trains of stimulation. This revealed that omissions following regular trains of stimulation showed higher cerebellar power in the beta band than those following irregular trains of stimulation, precisely when the omitted stimulus should have appeared. We also found evidence of cerebellar theta band activity encoding the rhythm of new sequences of stimulation

Our results furthermore strongly suggest that the putamen and the thalamus mirror the cerebellum in showing higher beta band power when omissions followed regular trains of stimulation compared to when they followed irregular trains of stimulation.

We interpret this as the cerebellum functioning as a clock that precisely encodes and predicts upcoming stimulation, perhaps in tandem with the putamen and thalamus. Relative to less predictable stimuli, perfectly predictable stimuli induce greater cerebellar power. This implies that the cerebellum entrains to rhythmic stimuli for the purpose of catching any deviations from that rhythm.

# 1 Introduction

Interest in the cerebellum has surged recently. This is likely due to the realization that it does not only subserve motor behaviour and coordination as previously believed (Schmahmann, 1997). In a recent study, using functional magnetic resonance imaging (fMRI), King et al. (2019) showed that the functions of the cerebellum span many domains, such as hand movements, saccades, divided attention, verbal fluency, autobiographical recall, word comprehension, action observation, mental arithmetic, emotion processing and language processing. Thus, it is involved in many functions hitherto believed to be associated with the cerebrum. In terms of surface area, it has also recently been shown that the cerebellum is only 20% smaller than the cerebral cortex (Serenio et al., 2020). Furthermore, it has become clear that the cerebellum actively predicts what feedback it should receive from the external world (Hull, 2020). Important questions here are what the spatio-temporal nature of these predictions is. In this study we focus on the temporal aspects, especially how the degree of irregularity in the environment affects cerebellar predictions. In a recent study (Andersen and Lundqvist, 2019), using magnetoencephalography (MEG), we found that the cerebellum was involved in maintaining and updating expectations when regularly timed somatosensory stimulation was interrupted by unexpected omissions of stimulation. We furthermore found that an evoked response in the secondary somatosensory cortex (SII) was elicited by the omitted stimuli at the exact time somatosensory stimulation was expected, despite an inter-stimulus interval (ISI) of 3 s between stimuli. This SII response has also been found with a shorter ISI, i.e. 500 ms (Naeije et al., 2018). This suggests that the temporal expectations are very precise even over long intervals. For comparison, ISIs must be shorter than at least 500 ms for auditory omissions to elicit responses (Joutsiniemi and Hari, 1989; Yabe et al., 1997).

The cerebellum has had a reputation of being impossible to study with non-invasive electrophysiological methods due to suspicions of it being too finely folded, which should result in signal cancellation, to produce signal measurable at a distance. However, we, (Andersen et al., 2020), recently reviewed the MEG and electroencephalographic (EEG) literature on cerebellar findings and found at least thirty MEG or EEG studies reported cerebellar activity. Supporting the validity of these findings, of which many did not have cerebellum as their primary target, Samuelsson et al. (2020) recently showed, using a combination of MEG signal simulation and high-resolution magnetic resonance imaging (MRI) capturing the fine structure of the cerebellum, that cerebellar signals are strong enough to be detectable by state-of-the-art MEG. The time thus seems ripe for investigating the cerebellum with a targeted study. We here follow the working hypothesis that the cerebellum functions as a clock creating temporal predictions about future stimulation.

The earliest MEG evidence pointing to the cerebellum playing an important role in updating and maintaining expectations is a study by Tesche and Karhu (2000) who estimated time courses for dipolar sources that they placed in the cerebellar vermis. They found oscillatory responses to omitted stimuli in the ranges 6-12 Hz and 25-35 Hz. These were maximal around the time the stimulus should have happened, indicating a relationship to expectational processes. We, (Andersen and Lundqvist, 2019), found more direct evidence of cerebellar oscillatory responses using a dynamic imaging of coherent sources (DICS) beamformer (Gross et al., 2001). We found that the cerebellum was more strongly activated in the first repetition of a stimulus compared to the very first stimulation for the ranges 4-7 Hz and 10-30 Hz. Furthermore, we found a tonic difference between omitted stimulations, i.e. unexpected absences of stimulation, and non-stimulations, i.e.

expected absences of stimulation in the range of 3-15 Hz. The tonic difference between non-stimulations and omissions was in the direction of more power in the non-stimulations in the mu-rhythm. This may be an effect of more power in the mu-rhythm when the body is at rest (Kuhlman, 1978), as is the case for non-stimulations. Thus, to find a time-dependent cerebellar response to omissions, as is to be expected if the cerebellum functions as a clock, we reasoned that omissions of different kinds should be contrasted against one another instead of against non-stimulations.

To this end, we have created a paradigm which in many ways is similar to those of Andersen and Lundqvist (2019) Naeije et al. (2018) and Tesche and Karhu (2000). Crucially, however, we manipulated the regularity of stimulation trains by adding different levels of temporal jitter. The basic idea of the paradigm is that an underlying rhythm is introduced with three tactile stimulations following one another with the same temporal spacing between them. Then three extra stimulations follow, either jittered (irregular) or with the same temporal spacing (regular), finally followed by an omission of stimulation. The paradigm also included longer periods of non-stimulation that would follow an omission.

The main hypothesis of the current study is that the cerebellum will be more strongly activated to omissions of otherwise expected stimulation during regular than during irregular stimulation trains. We expect this difference in cerebellar activation to occur around the expected timing of the omitted stimulus following the underlying rhythm established by the first three stimuli. Based on the findings in Andersen and Lundqvist (2019) and Tesche and Karhu (2000) we expect these differences to occur in the theta and beta bands.

Following the recent findings of Andersen and Lundqvist (2019), Fardo et al. (2017), Naeije et al. (2018) and Allen et al. (2016), we also investigated other areas that are implicated in somatosensation and in updating sensory expectations, specifically the primary and secondary somatosensory cortices (SI and SII), and the inferior parietal cortex (IPC).

Finally, it must be mentioned that when speaking of timing capabilities, structures of the basal ganglia and thalamus are likely to be heavily involved (Harrington and Haaland, 1998). In fact, it has been proposed that the basal ganglia and the cerebellum together with the thalamus are nodes of an integrated network responsible for cognitive timing (Bostan and Strick, 2018; Gibbon et al., 1997), and dysfunction of this network has been implicated in Parkinson's Disease (Caligiore et al., 2016). We thus also should expect differences in the basal ganglia and the thalamus, but due to both the depth and the closed structures of neurons (Lorente de Nó, 1947) in basal ganglia structures and the thalamus, MEG is deemed anything but insensitive to these structures (Hari and Puce, 2017). However, Attal et al. (2012) (see also: (Attal and Schwartz, 2013)) argue that MEG should be at least as sensitive to the putamen of the basal ganglia as MEG is to the hippocampus, which is recently seen as a more and more viable target of MEG (Garrido et al., 2015; Ruzich et al., 2019). Attal and Schwartz (2013) also showed experimental evidence that thalamic activation may be within reach of MEG (see also: Pizzo et al., 2019). Therefore, we investigated the putamen of the basal ganglia and the thalamus.

## 109 2 Methods

### 110 2.1 Participants

111 Thirty right-handed participants volunteered to take part in the experiment (seventeen males  
112 and thirteen females, Mean Age: 26.7 y; Standard Deviation: 6.3 y; Range: 18-41 y). The  
113 experiment was approved by the local institutional review board in accordance with the Declaration  
114 of Helsinki.

### 115 2.2 Stimuli and procedure

116 Tactile stimulation was generated by two ring electrodes driven by an electric current  
117 generator (Stimulus Current Generator, DeMeTec GmbH, Germany). The ring electrodes were  
118 fastened to the tip of the right index finger. One was placed 10 mm below the bottom of the nail and  
119 the other 10 mm below that. Three kinds of sequences were administered. 1) a steady sequence,  
120 where all stimuli happened exactly on time; 2) a jittered sequence, where stimuli 4-6 were 5 %  
121 jittered, i.e. they happened from  $\sim -75$  ms to  $\sim 75$  ms (in steps of 1 ms) relative to where the stimulus  
122 would have happened, had the sequence been steady; 3) a heavily jittered sequence, where stimuli  
123 4-6 were 15 % jittered, i.e. they happened from  $\sim -225$  ms to  $\sim 225$  ms (in steps of 1 ms) relative to  
124 where the stimulus would have happened, had the sequence been steady. For both cases, the  
125 stimulation had to be a minimum of 13 ms away from the time where the steady stimulus would  
126 have happened.

127 150 sequences of each kind were administered, resulting in 3,300 events of which 2,700 were  
128 stimulations and 450 were omissions. The remaining 150 were non-stimulations. Stimuli were  
129 administered in trains of six with an ISI of 1,487 ms. This made sure that stimulation would not  
130 lock to the 50 Hz power coming from electrics. After the sixth stimulus an omission of stimuli  
131 occurred and a new train of stimulation was begun. Thus, between the last stimulus of a train and  
132 the following train 2,974 ms elapsed (Fig. 1). An exception to this was that after each fifteen  
133 sequences, a train of five non-stimulations would occur, i.e.  $5 \times 1,487$  ms of no stimulation. Thus,  
134 omissions and non-stimulations differ by whether or not an expectation was present in the time  
135 leading up to it. This structure resulted in 450 *First Stimulations*, 450 *Repeated Stimulations (2)* and  
136 450 *Repeated Stimulations (3)*. Note that the first three stimulations are identical in all three  
137 conditions and are thus collapsed. Furthermore, this resulted in  $3 \times 150$ , one for each of the three  
138 conditions, *Repeated Stimulations (4)*, *Repeated Stimulations (5)* and *Repeated Stimulations (6)*.  
139 Finally, it resulted in  $3 \times 150$ , one for each of the three conditions, *Omitted Stimulation* and a total  
140 of 150 *Non-Stimulations*.

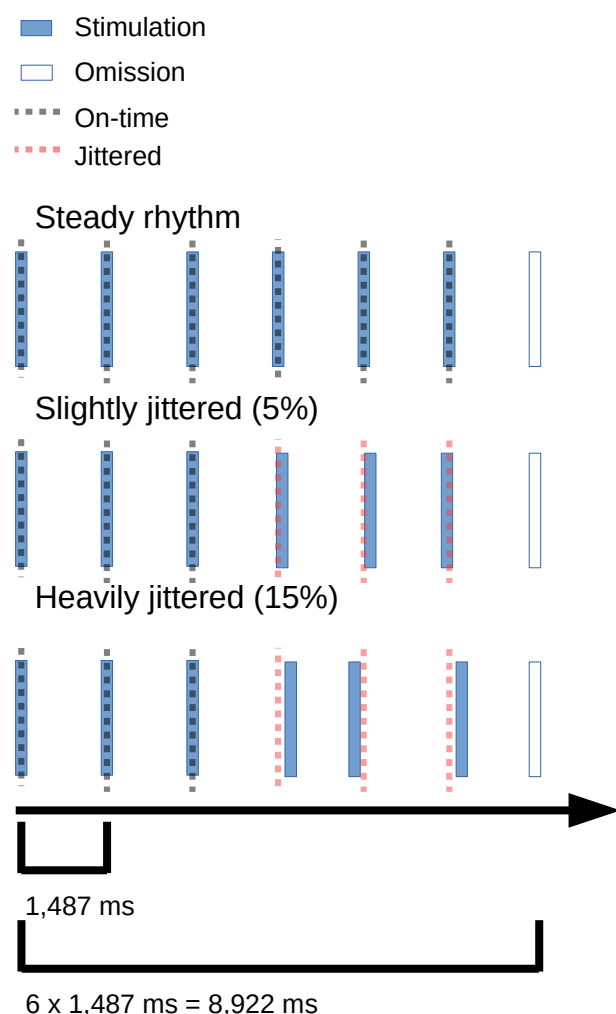

**Fig. 1: Stimulation sequence:** There are three conditions. A steady rhythm where all stimulations are on-time, with an inter-stimulus interval of 1,487 ms. For the two jittered conditions, the first three stimuli are on time while the last three are off-time with different amounts of jitter, randomly chosen. The omission is timed to where the stimulus would have occurred, had it been on-time, i.e. 8,922 ms after the first stimulation. Black vertical lines indicate that the stimulation is on-time, and the red lines indicate that they are jittered. The red lines furthermore indicate where the stimulus should have occurred, had it been regular.

141 During the stimulation procedure, participants watched a nature programme with sound from  
 142 panel speakers. Participants were instructed to pay full attention to the movie and pay no attention  
 143 to the stimulation of the finger.

144 Electro-oculography, -cardiography and myography (EOG, ECG and EMG) were recorded. For  
 145 EOG, eye movements and eye blinks were recorded to monitor participants. EMG was recorded  
 146 over the splenius muscles. These were used to monitor that the participant would not build up  
 147 tension in the neck muscles. Lastly, for explorative purposes, respiration was measured using a  
 148 respiratory belt but is not analysed here.

## 2.3 Preparation of participants

In preparation for the measurement, each participant had two pairs of EOG electrodes placed horizontally and vertically, respectively, around the eyes. ECG was measured by having a pair of electrodes on each collarbone. Finally, two pairs of EMG electrodes were placed on either side of the splenius muscles. Four head-position indicator (HPI) coils, two behind the ears and two on the forehead, were placed on the participants. Subsequently, each participant had their head shape digitized using a Polhemus FASTRAK. Three fiducial points, the nasion and the left and right pre-auricular points, were digitized along with the positions of the HPI-coils. Furthermore, around 200 extra points digitizing the head shape of each participant were acquired. Participants were subsequently placed in the supine position of the MEG system and great care was taken, such that they would lie comfortably in the scanner, thus preventing neck tension.

## 2.4 Acquisition of data

Data was recorded on an Elekta Neuromag TRIUX system inside a magnetically shielded room (Vacuumschmelze Ak3b) at a sampling frequency of 1,000 Hz. As data was acquired online, low-pass and high-pass filters were applied, at 330 Hz and 0.1 Hz respectively.

## 2.5 Processing of MEG data

We analysed evoked responses and oscillatory responses. MaxFilter was not applied to preserve the rank of the data. The four first signal space projections (SSPs) were projected out for the sensor space analyses due to the strong influence of gradients on the magnetometers.

For the evoked responses, we low-pass filtered the data at 40 Hz (finite impulse response; zero-phase; -6 dB cutoff frequency: 45 Hz; order: 198) and then cut the raw data into epochs of 800 ms, 200 ms pre-stimulus and 600 ms post-stimulus. The epochs were demeaned using the pre-stimulus period. Segments of data including magnetometer responses greater than 4 pT or gradiometer responses greater than 400 pT/m. Subsequently, epochs were averaged to create evoked responses for each of the trial types.

For the oscillatory responses, the data were band-pass filtered into the theta and beta bands, both zero-phase with a -6 dB cutoff frequency: from 4-7 Hz (Theta) and 14-30 Hz (Beta). A Hilbert transform was applied to both bands and the data were cut into epochs of 1,500 ms, 400 ms pre-stimulus and 1,100 ms post-stimulus for the stimulations and 750 ms pre-stimulus and 750 ms post-stimulus for the omissions. The stimulation epochs were demeaned using the pre-stimulus interval up to -50 ms, whereas the omission epochs were demeaned using the whole time-interval. The difference in demeaning was due to the lack of evoked responses for omission epochs. Segments of data including magnetometer responses greater than 4 pT or gradiometer responses greater than 400 pT/m were rejected. Epochs were not rejected based on EOG and EMG due to beamformers (see below) being good at suppressing the artefacts arising from eye blinks and movements. We calculated the envelopes of the Hilbert transformed data, and, finally, to minimise the effect of outliers on the average of epochs, for each contrast of interest, we converted that contrast to a z-score, using a Wilcoxon signed-rank test entering each condition of the contrast into the test.



## 187 2.6 Source reconstruction

188 For both the evoked responses and the oscillatory responses, a linearly constrained minimum  
189 variance (LCMV) beamformer (van Veen et al., 1997) was applied. For the former, it was applied to  
190 evoked responses and for the latter to the Hilbert transformed epochs.

191 We acquired sagittal T1 weighted 3D images for each participant using a Siemens Magnetom  
192 Prisma 3T MRI. The pulse sequence parameters were: 1 mm isotropic resolution; field of view: 256  
193 mm x 256 mm; 192 slices; slice thickness: 1 mm; bandwidth per pixel: 290 Hz/pixel; flip angle: 9°,  
194 inversion time (TI): 1,100 ms; echo time (TE): 2.61 ms; repetition time (TR): 2,300 ms. Based on  
195 these images, we did a full segmentation of the head and the brain using FreeSurfer (Dale et al.,  
196 1999; Fischl et al., 1999). Subsequently we delineated the head and brain surfaces using the  
197 watershed algorithm from MNE-C (Gramfort et al., 2013). We created a volumetric source space  
198 from the brain surface with sources 7.5 mm apart from one another (~4000 sources). Single  
199 compartment boundary element method (BEM) solutions (volume conduction models) were  
200 calculated from the brain surfaces. For each participant, the T1 was registered to the participant's  
201 head shape with the fiducials and head shape points acquired with Polhemus FASTRAK. Finally,  
202 with the co-registered T1, we created two forward models based on the volume conduction model,  
203 the positions of MEG sensors, and the volumetric source space.

204 For estimating source time courses, the data covariance matrix was estimated based on the post-  
205 stimulus period (from 0 ms to 600 ms) for the evoked responses. For the oscillatory responses, the  
206 data covariance matrix was estimated based on the post-stimulus time period (from 0 ms to 1,100  
207 ms) for the stimulations, and for the omissions the data covariance matrix was estimated based on  
208 the whole time period (-750 ms to 750 ms). No regularisation was applied when estimating the filter  
209 weights. For the filters, we chose the source orientation that would maximise source output. Finally,  
210 for the oscillatory responses, we took the absolute value of the complex-valued LCMV-source-time-  
211 courses, and averaged over all the epochs to acquire an averaged source time course for both bands  
212 (4-7 Hz and 14-30 Hz). For the evoked responses, we also used the absolute value of the estimated  
213 source time courses.

214 For all LCMVs only magnetometers were used since these are the sensors most sensitive to  
215 deep sources. These source reconstructions were morphed onto *fsaverage*, a common template from  
216 FreeSurfer. Note, that signal space projection vectors were not applied on the data to be  
217 beamformed since beamformers suppress low-rank external noise well (Sekihara and Nagarajan,  
218 2008).

219 To investigate contrasts in an unbiased manner, the spatial filter of the LCMV beamformer was  
220 estimated based on the covariance of the combined data. Subsequently, this filter was used to  
221 estimate the power for each condition in the contrast and finally the contrast for the oscillatory  
222 responses was calculated as:  $(condition\_1 - condition\_2) / (condition\_1 + condition\_2)$ , meaning  
223 that the contrast expresses the difference in power as a percentage of total power in the two  
224 conditions. For the evoked responses, we looked at the difference ( $condition\_1 - condition\_2$ ).

## 225 2.7 Statistical analysis

226 For the oscillatory responses, we focused on the comparisons between the *Omissions*, with the  
227 difference between *Omission 0* and *Omission 15* expected to be the strongest. Also the comparison  
228 between *First Stimulation* and *Repeated Stimulation (2)* was interesting due to the difference in



expectation and our earlier findings of a difference in the theta band (Andersen and Lundqvist, 2019). We used a cluster permutation test (Maris and Oostenveld, 2007) to address the multiple comparisons problem arising from doing all-sensor and whole-brain analyses. The analyses done in sensor space were done on the whole time range (-400 ms to 1,100 ms for the stimulations and -750 ms to 750 ms for the omission). We used this to inform the time range of our subsequent tests for the whole-brain analysis. The null hypothesis of such a test is that data are exchangeable, meaning colloquially speaking that our labelling does not matter. The alternative hypothesis then is that the labelling does matter. The procedure was as follows. First we conducted a *t*-test for each of the time-sensor or time-source combinations (e.g. for the beamformer: 801 time samples and 4,342 sources; > 3 million tests). Then spatio-temporal clusters were formed based on connecting neighbouring sensors/sources and neighbouring time points. Only time-sensor/source combinations that were significant at  $\alpha = 0.05$  were included in clusters. 1024 permutations were then run where the condition labels, e.g. *Omission\_0* and *Omission\_15*, were shuffled between trials. Using the same procedure as for the correctly labelled trials, spatio-temporal clusters were formed from the significant tests for each of the permutations. A null hypothesis distribution was sampled by adding the value of the largest cluster to the distribution for each permutation. The largest cluster in each permutation was defined as the one that had the largest sum of absolute *t*-values. For each cluster in the correctly labelled trials, the likelihood of that cluster, or one more extreme, was found, its *p*-value, given the sampled null hypothesis distribution. The null hypothesis that the data is exchangeable was then rejected if the largest cluster in the correctly labelled data was associated with a *p*-value that is lower than the alpha value, which we set at 0.05.

For the evoked responses, we did the cluster permutation tests on the source time courses directly, since the SI and SII responses were expected. We focused on the comparisons between *First Stimulation* and *Repeated Stimulation (2)* and between *Omitted Stimulation* and *Non-Stimulation* following Andersen and Lundqvist (2019). We tested on the full time range (-200 ms to 600 ms).

## 3 Results

### 3.1 Evoked responses

The electric stimulations gave rise to the expected SI and SII activations (Fig. 2)

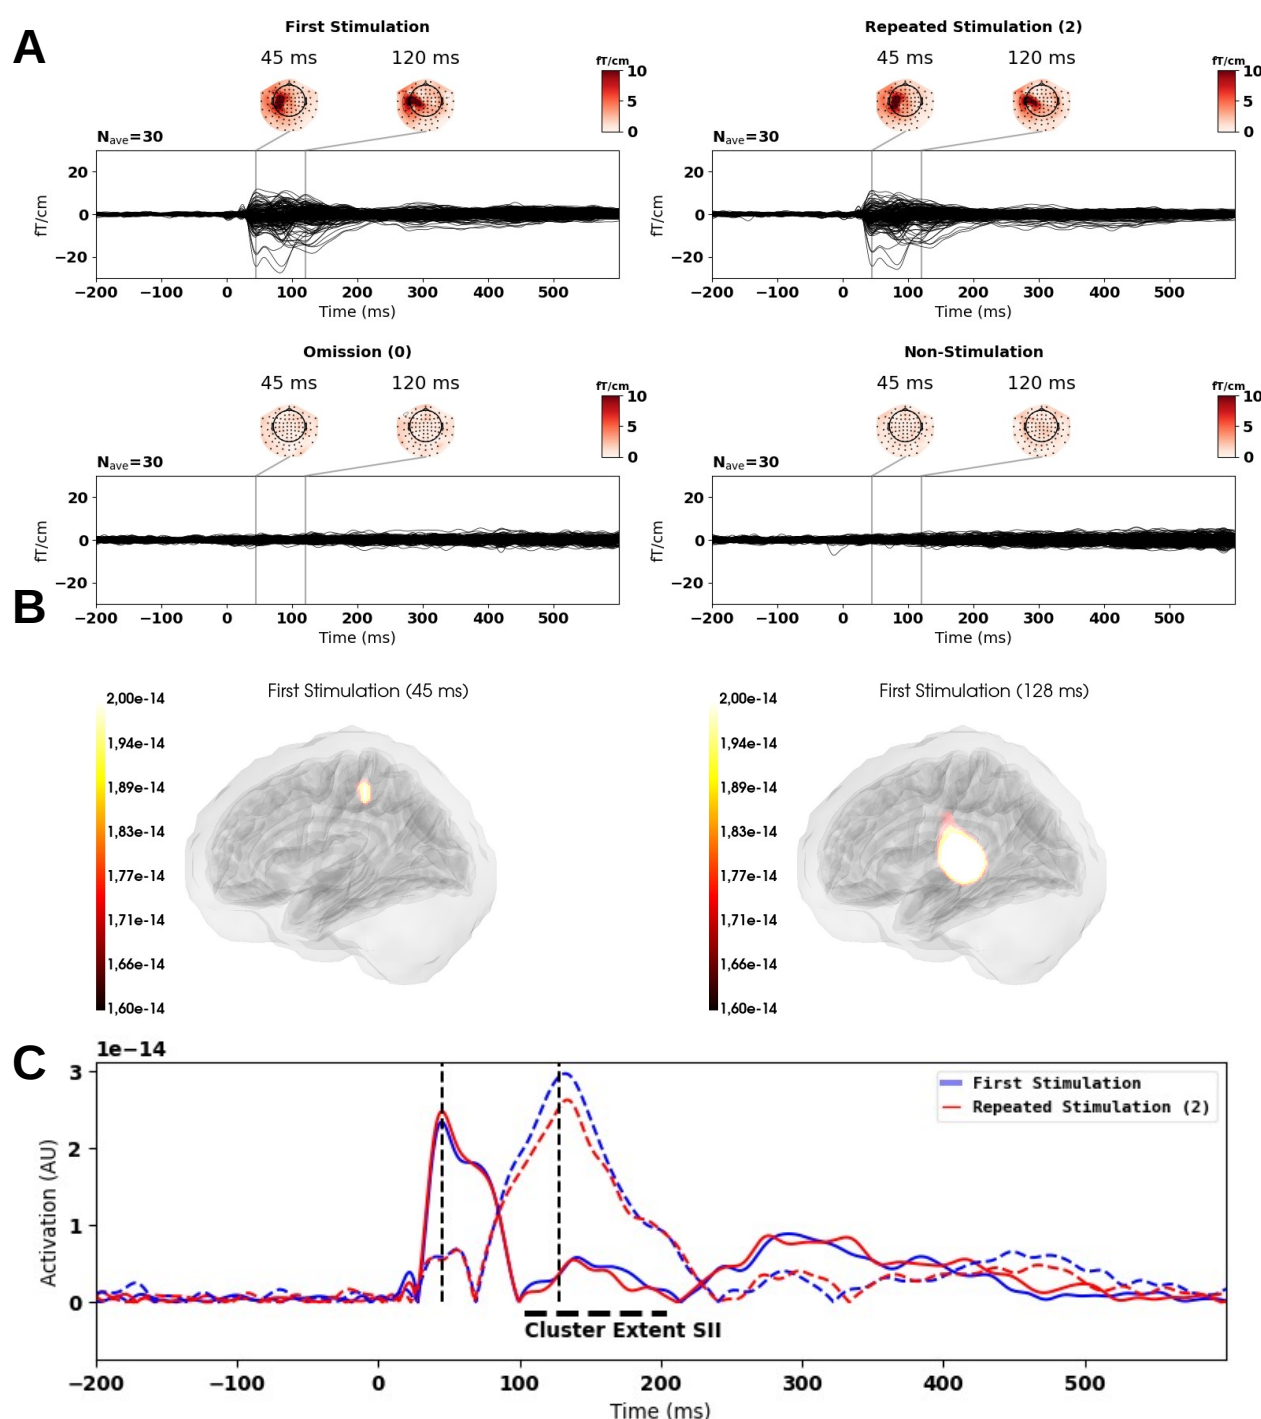

**Fig. 2: Evoked time courses and source reconstructions. A)** Evoked time courses for First Stimulation, Repeated Stimulation (2), Omission (0) and Non-Stimulation. The former two show SI and SII time courses, whereas no responses are found for the latter two. **B)** Source maps showcasing the early SI activation (left) (45 ms) and joined by the later SII activation (right) (128 ms). **C)** Time courses for the two sources shown in **B**; full lines show SI sources; coloured punctured lines show SII sources; vertical black punctured lines indicate the time points show in **B**. The black punctured line represents the extremes of the cluster extent for the difference between *First Stimulation* and *Repeated Stimulation* (2).

Surprisingly, no omission responses were found (Fig. 2A). This is in contrast to two recent studies (Andersen and Lundqvist, 2019; Naeije et al., 2018), in which evoked responses source localized to SII were found peaking around 130 ms. A difference between these two studies and the

current, is that we in the current study used electric stimulation, whereas the two other studies used an inflatable membrane that pressed on the finger when inflated. Differences were found between *First Stimulation* and *Repeated Stimulation (2)* for the source time courses when using the cluster permutation procedure described above in the time range -200 ms to 600 ms ( $p_{\text{BIGGEST\_CLUSTER}} = 0.00098$ ). No differences were found between *Omission 0* and *Non-Stimulation* ( $p_{\text{BIGGEST\_CLUSTER}} = 0.73$ ).

## 3.2 Oscillatory responses

For the oscillatory responses, we focused on the theta and beta band responses, following the results of Andersen and Lundqvist (2019) and Tesche and Karhu (2000). For the stimulations, the main contrast of interest was between *First Stimulation* and *Repeated Stimulation (2)*. In the beta band, the null hypothesis could not be rejected ( $p_{\text{BIGGEST\_CLUSTER}} = 0.72$ ). In the theta band, we found that 47 magnetometers formed part of two spatiotemporal clusters with  $p$ -values  $< 0.05$  ( $p_{\text{BIGGEST\_CLUSTER}} = 0.00098$ ) (Fig. 3A). Given that the responses peaked around 200 ms, we centred the subsequent source cluster analysis on the window of -200 ms to 600 ms. We found one cluster with a  $p$ -value  $< 0.05$  ( $p_{\text{BIGGEST\_CLUSTER}} = 0.00098$ ). The maximal value was found for the left inferior parietal cortex at 145 ms (Fig. 3D), beginning at 0 ms (Fig. 3F). A left cerebellar activation was also found after 290 ms (Fig. 3C),. For the comparison between *Repeated Stimulation (2)* and *Repeated Stimulation (3)* the null hypothesis could not be rejected ( $p_{\text{BIGGEST\_CLUSTER}} = 0.12$ ). For descriptive purposes, we reconstructed all the first three stimulations based on a common spatial filter and estimated time courses for the sources shown in Fig. 3CD (Fig. 3EF). These show the cerebellar and inferior parietal cortical activity for each of the conditions in separation.

# Theta band (4-7 Hz)

## First Stimulation vs. Repeated Stimulation (2)

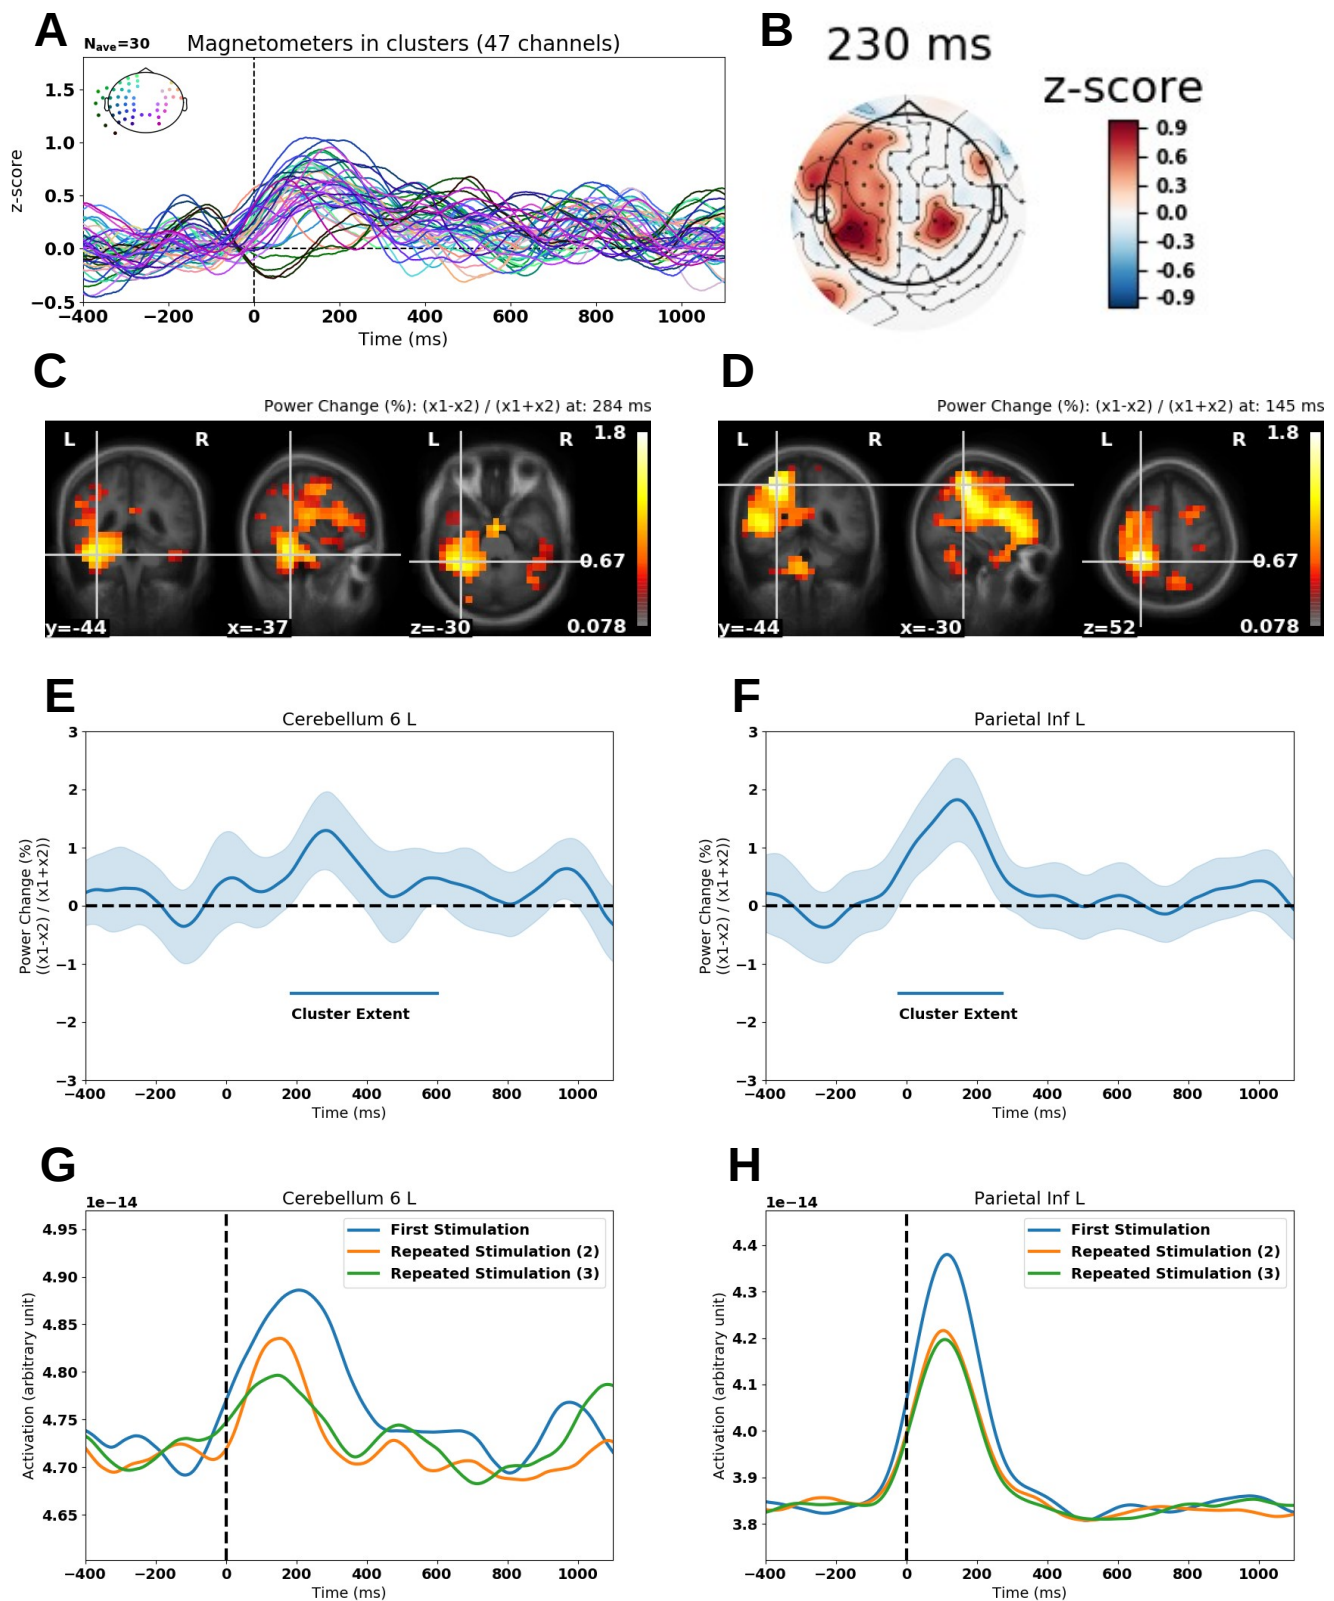

**Fig. 3: Differences between *First Stimulation* and *Repeated Stimulation (2)* in the theta band (4-7 Hz) (-200 ms to 600 ms).** For all plots, positive values imply greater amplitude in *First Stimulation* than in *Repeated Stimulation (2)*. **A)** Grand average butterfly plot with colour coded magnetometers according to helmet position. Only magnetometers

being part of clusters with a probability less than 0.05 under the sampled null hypothesis distribution are shown **B**) Topographical plot at 230 ms after stimulation, with sensors not forming part of a cluster masked out. **C**) Contrast localized to the left cerebellum at 284 ms: The heat map is thresholded such that values that are not part of a cluster have been set to 0. **D**) The maximum contrast over the whole time course localized to the left inferior parietal cortex at 145 ms: The heat map is thresholded such that values that are not part of a cluster have been set to 0. **E**) and **F**) Time courses for the contrast between *First Stimulation* and *Repeated Stimulation* (2) with 95% confidence intervals, extracted from the sources in **C** and **D**. **G**) and **H**) Time courses for *First Stimulation*, *Repeated Stimulation* (2) and *Repeated Stimulation* (3), extracted from the sources in **C** and **D**. Time courses in **E-H** are extracted from the source showing the maximum activation according to the automated anatomical labeling atlas (AAL) (Tzourio-Mazoyer et al., 2002).

For the omissions, the main contrast of interest was between *Omission 0* and *Omission 15*, as we expected the cerebellar contrast to be the strongest there. In the theta band, the null hypothesis could not be rejected ( $p_{\text{BIGGEST\_CLUSTER}} = 0.25$ ). In the beta band, we found that 14 magnetometers formed part of three spatiotemporal clusters with  $p$ -values  $< 0.05$  ( $p_{\text{BIGGEST\_CLUSTER}} = 0.014$ ) (Fig. 4A). The sensor topography (Fig. 4B) was compatible with an underlying cerebellar source on the right side. For the source reconstruction, we found one cluster with a  $p$ -value  $< 0.05$  ( $p_{\text{BIGGEST\_CLUSTER}} = 0.0078$ ) testing on the time interval from -400 ms to 400 ms. A right cerebellar source was part of the cluster (Fig. 4C), and the maximally responding source 0 ms was in the putamen (Fig. 4D). Running similar tests for *Omission 0* vs *Omission 5* and *Omission 5* vs *Omission 15* resulted, however, in not being able to reject the null hypothesis ( $p_{\text{BIGGEST\_CLUSTER}} = 0.18$  and  $p_{\text{BIGGEST\_CLUSTER}} = 0.11$  respectively). Again, for descriptive purposes, we reconstructed all three types of omissions based on a common spatial filter and estimated time courses for the sources shown in Fig. 4CD (Fig. 4EF). These show that cerebellar and putamen activity starts increasing around -250 ms of stimulation when the omission is preceded by a regular train of stimulation (*Omission 0*) and starts decreasing again around 0 ms. The opposite pattern emerges for the omissions preceded by irregular trains of stimulation (*Omission 5* and *Omission 15*), which decrease from -250 ms and start increasing from 0 ms.



# Beta band (14-30 Hz)

## Omission 0 vs. Omission 15

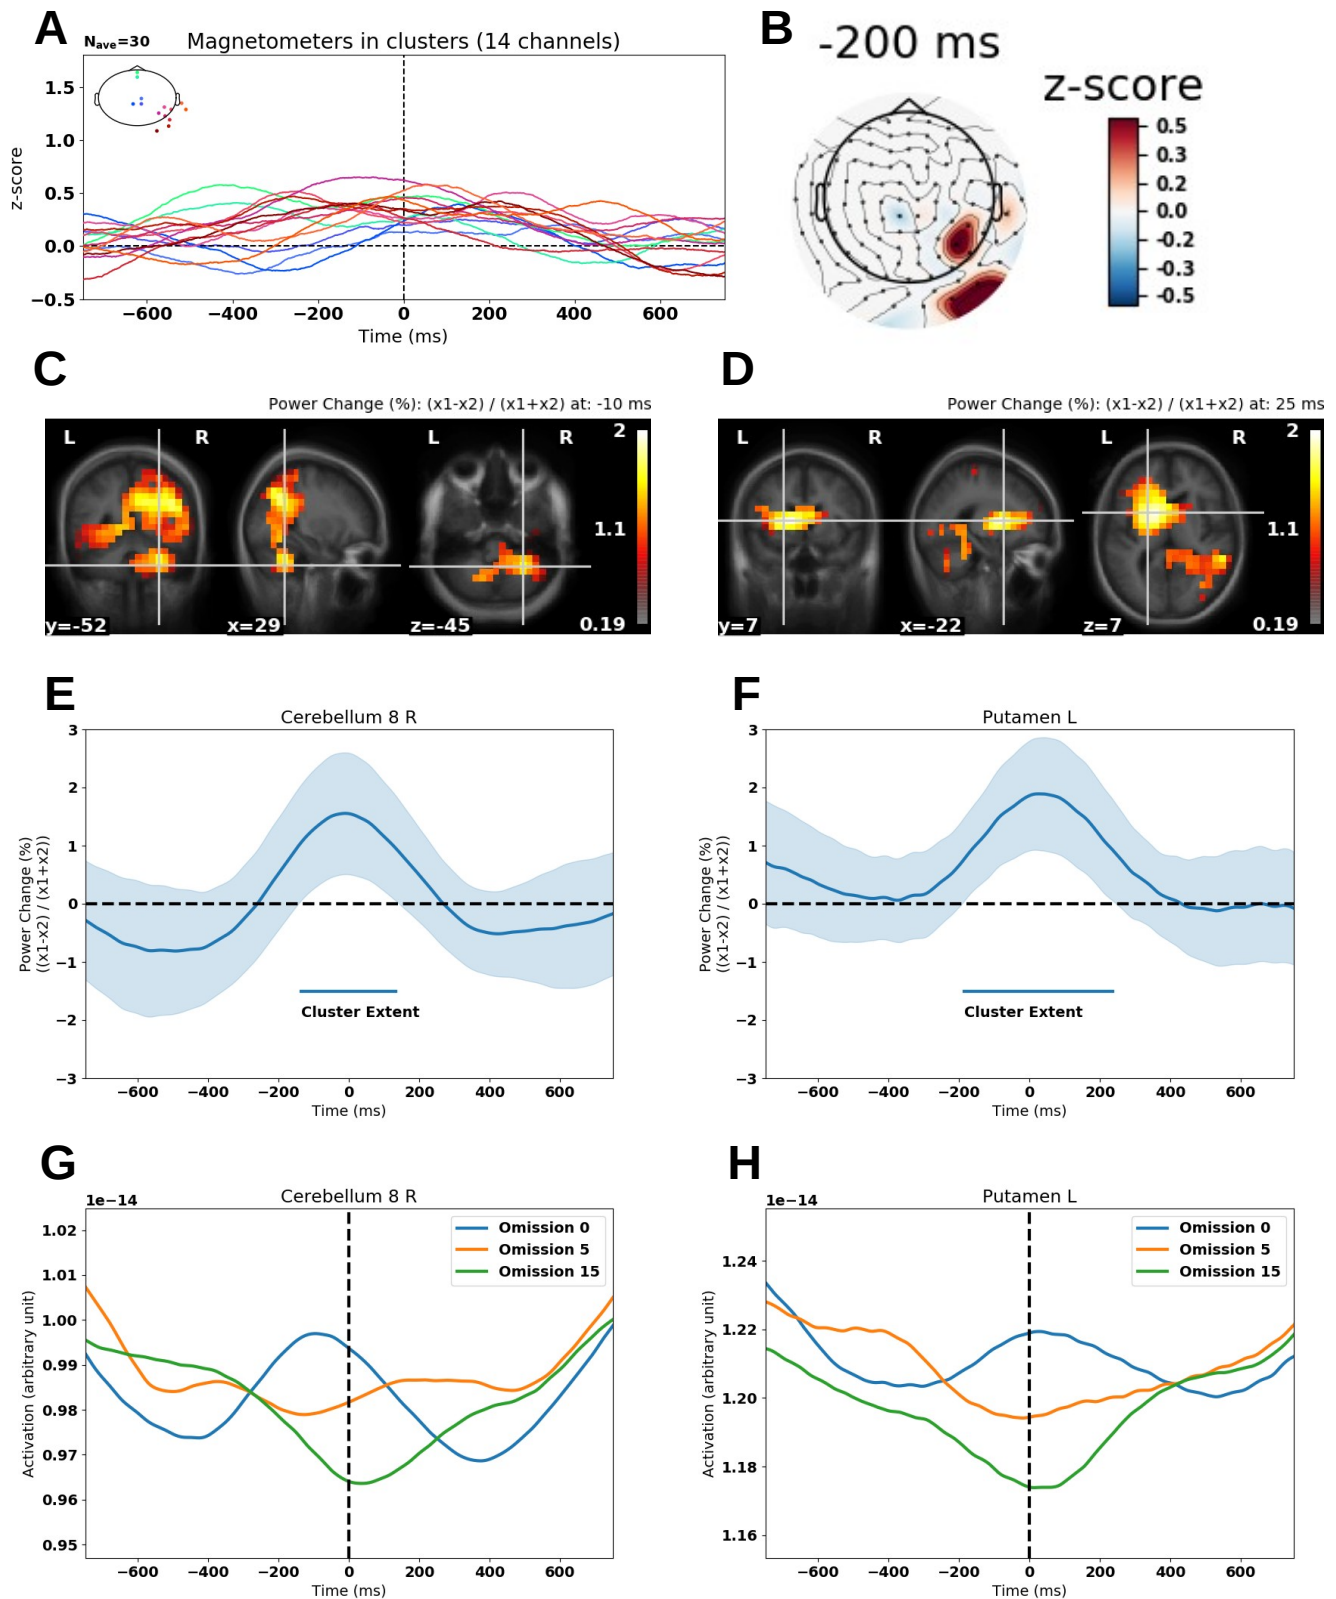

**Fig. 4: Differences between *Omission 0* and *Omission 15* in the beta band (14-30 Hz) (-400 ms to 400 ms).** For all plots, positive values imply greater amplitude in *Omission 0* than in *Omission 15*. **A)** Grand average butterfly plot with colour coded magnetometers according to helmet position. Only magnetometers being part of clusters with a probability

less than 0.05 under the sampled null hypothesis distribution are shown. **B)** Topographical plot at -200 ms, with sensors not forming part of a cluster masked out. **C)** Contrast localized to the right cerebellum at -11 ms: The heat map is thresholded such that values that are not part of a cluster have been set to 0. **D)** The maximum contrast over the whole time course at 0 ms localized to the left putamen, and this peaked at 25 ms: The heat map is thresholded such that values that are not part of a cluster have been set to 0. **E)** and **F)** Time courses for the contrast between *Omission 0* and *Omission 15* with 95% confidence intervals, extracted from the sources in **C** and **D**. **G)** and **H)** Time courses for *Omission 0*, *Omission 5* and *Omission 15*, extracted from the sources in **C** and **D**. Time courses in **E-H** are extracted from the source showing the maximum activation according to the automated anatomical labeling atlas (AAL) (Tzourio-Mazoyer et al., 2002).

300 We investigated the other areas of interest besides cerebellum and putamen. For the contrast  
301 between *Omission 0* and *Omission 15* in the beta band, we also found differences in the thalamus,  
302 the inferior parietal cortex, SI and SII (Fig. 5) In summary, we found that non-cortical structures,  
303 i.e. cerebellum, putamen and thalamus, followed the expected timing, i.e. the contrast peaking at ~0  
304 ms, whereas cortical structures such as SI and inferior parietal cortex peaked before the expected  
305 stimulus (~-250 ms) and SII peaking after the expected stimulus (~250 ms).

## Beta band (14-30 Hz)

### *Omission 0* vs. *Omission 15*

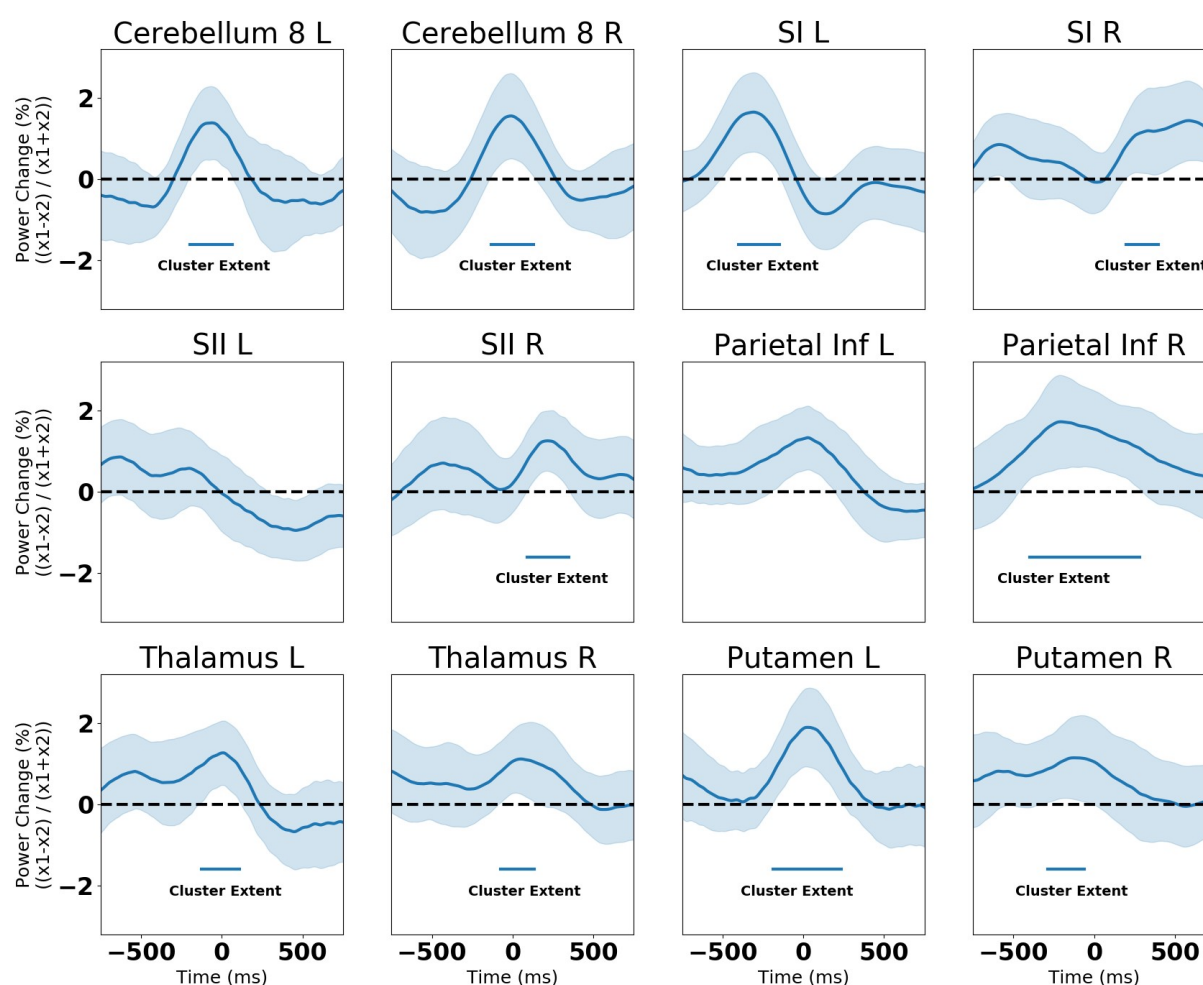



# Fig. 5: Omission contrast time courses for the areas of interest in the beta band:

Time courses are extracted from the source showing the maximum contrast according to the automated anatomical labeling atlas (AAL) (Tzourio-Mazoyer et al., 2002) with the exception of SII, which is from the Harvard Oxford cortical atlas (Desikan et al., 2006). See Supplementary Fig. 1 for the individual time courses.

306 We then investigated the same areas for the contrast between *First Stimulation* and *Repeated*  
 307 *Stimulation (2)* for the theta band (Fig. 6). Here, we found differences in the very same areas.  
 308 Except for the cerebellum, all differences were expressed around the peak of the left inferior  
 309 parietal cortex (~145 ms) (Fig. 3D&F&H). The cerebellar differences peaked around 285 ms for the  
 310 left side and around 500 ms for the right side.

## Theta band (4-7 Hz)

### *First Stimulation vs. Repeated Stimulation (2)*

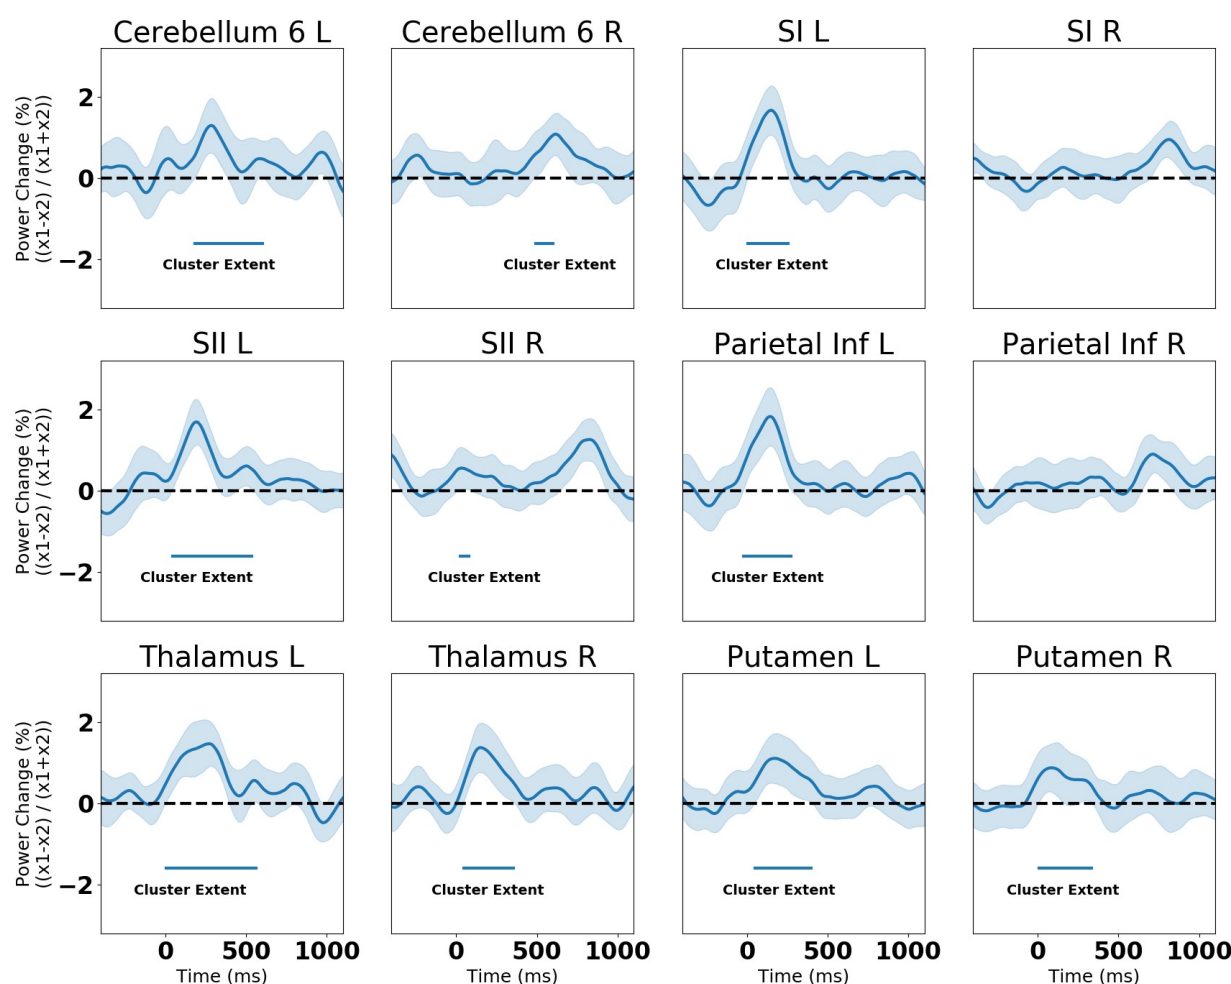

# Fig 6: Stimulation contrast time courses for the areas of interest in the theta band:

Time courses are extracted from the source showing the maximum contrast according to the automated anatomical labeling atlas (AAL) (Tzourio-Mazoyer et al., 2002) with the exception of SII, which is from the Harvard Oxford cortical atlas (Desikan et al., 2006). See Supplementary Fig. 2 for the individual time courses.

## 311 4 Discussion

312 In this study we investigated if and how the cerebellum is involved in timing expectations. We  
313 presented trains of electrical stimulation that were either regularly timed or irregularly timed and  
314 followed by an omission of stimulation. We found that our hypothesis, that cerebellum more  
315 strongly activates to omissions appearing in a regularly timed train than in an irregularly timed  
316 train, to be corroborated by our beta band findings, showing that the contrast and the omission  
317 activity related to the regular train was at their strongest close to 0 ms (Fig. 4E & 4G).

### 318 4.1 A cerebellar clock (the beta band)

319 That the differences in cerebellum is maximal around the expected time of stimulation indicates  
320 that cerebellar power reflects the strength of the temporal expectation, which theoretically should be  
321 strongest in the predictable condition. In this regard, the cerebellum functions as a clock keeping  
322 track of when sensory information is supposed to arrive. On the contrary, when there is temporal  
323 uncertainty regarding when the stimulus should arrive cerebellar activity decreases around the time  
324 of the expected stimulation, and for the most uncertain one (*Omission 15*) most so (Fig. 4E).  
325 Cerebellar power thus reflects the prediction of an upcoming somatosensory stimulation, as beta  
326 band power is expected to increase when predicted information is expected to arrive (Engel and  
327 Fries, 2010) (Fig. 4E). The cerebellar findings here are also similar to findings from the auditory  
328 domain, where it has been shown that beta band power in the auditory cortex synchronizes with the  
329 rhythm of auditory stimuli, peaking at their occurrence and then decreasing again (Arnal and  
330 Giraud, 2012; Fujioka et al., 2012).

331 Interestingly, the most irregular condition (*Omission 15*) showed a dip for oscillatory power  
332 around the time, the stimulation should have occurred, had the pattern been regular (Fig. 4G). In  
333 this condition, a stimulation is expected, but its exact timing is uncertain. Given that a function of  
334 prediction is to inhibit the processing of the expected stimulus, we can interpret this as the  
335 cerebellum uninhibiting the processing of the spatially expected, but temporally unexpected,  
336 stimulus. Interestingly, the dip begins just before the earliest time that the stimulation could occur  
337 (~-225 ms) and is back to pre-expected-stimulus levels at around 225 ms. This suggests that the  
338 clock is even tracking the range within which the stimulus should occur. This possibility is  
339 seemingly contradicted by the observation that the slightly jittered condition (Fig. 1) also starts  
340 decreasing around 225 ms (5 % of 1,487 ms = 74 ms). This can however be explained by us having  
341 used an interleaved design; i.e. when the cerebellum detects jitter in the stimulation, there is no  
342 principled way of deciding, in the current design, whether a given stimulation train is 5 % jittered  
343 because any 5 % jittered train is compatible with being a 15 % jittered train. To test whether the  
344 decrease adapts this precisely to the temporal uncertainty, a blocked design could prove useful in  
345 subsequent studies.

346 Our results furthermore indicated that the putamen and thalamus are more strongly activated for  
347 the omission preceded by regular trains than omissions preceded by irregular trains. This fits well  
348 with the knowledge that the thalamus and basal ganglia are involved in timing as a recent meta-  
349 analysis of fMRI timing studies showed (Teghil et al., 2019). Of notice is that they follow the  
350 timing of the cerebellum, peaking around 0 ms, indicative of a network of cerebellum, putamen and  
351 thalamus (Bostan and Strick, 2018; Caligiore et al., 2016; Gibbon et al., 1997). For these, we also

352 saw the dip in power for the most irregular condition (*Omission 15*) (Fig. 4H, Supplementary Fig.  
353 1).

354 Importantly though, activations of putamen and thalamus found using MEG must be treated  
355 with caution. Both are not optimal targets for MEG, due to their deep locations and the closed field  
356 of their neurons (Lorente de Nó, 1947). This results in a weak signal when measured outside the  
357 head that makes it challenging to say with confidence which deep source produced the MEG signal.  
358 However, theoretical work and simulation studies show that MEG should be sensitive to thalamus  
359 and putamen (Attal et al., 2012; Attal and Schwartz, 2013), albeit at a degree much lower than its  
360 sensitivity to the neocortex. In terms of experimental evidence, it was recently shown that MEG can  
361 retrieve patterns of activation from the putamen and thalamus (Pizzo et al., 2019). This theoretical  
362 and experimental evidence together with the knowledge that the present paradigm should elicit  
363 activity in the basal ganglia and the thalamus combined with the high number of omission trials  
364 ( $N=150$ ) mean that we believe that the present evidence is supportive, but not conclusive, of actual  
365 putamen and thalamus activations measured by MEG.

366 In contrast to the cerebellum, the SI and inferior parietal cortical contrasts peaked before (Fig.  
367 5) the expected arrival of the stimulus and the SII contrast peaked after the expected arrival of the  
368 stimulus. The SI and inferior parietal cortex differences may indicate a dampening of cortical  
369 activity before the onset of an expected stimulus, compatible with the decrease in theta band activity  
370 for repeated stimulations (Figs. 3 & 6). The SII activity may reflect an update of the current state of  
371 affairs, i.e. that the train of stimulation has been broken. Similar results have been reported for  
372 omissions in the auditory domain, with beta band power increasing in the time interval after the  
373 expected, but omitted, stimulus in the auditory cortex (Fujioka et al., 2009).

374 We unexpectedly did not find an SII evoked response to the omissions (Fig. 2), despite two  
375 recent studies having reported this (Andersen and Lundqvist, 2019; Naeije et al., 2018). Both these  
376 studies used tactile stimulation by inflating a membrane fastened to the fingertips of participants  
377 and found an SII response around 150 ms time-locked to the expected, but omitted, stimulation. A  
378 possible explanation for not finding such a response in the current study is that the  
379 instantaneousness of the electrical stimulation used in the current study relative to the longer  
380 extended touch of the membrane makes it harder for the brain to time-lock to the exact time point.  
381 This would have the consequence that evoked analyses would not be sensitive to the SII response,  
382 but that the Hilbert transformation strategy that we applied would, given its sensitivity to responses  
383 that are not precisely time-locked. Thus, it is possible that the reported SII response (Fig. 5) is  
384 similar to the response reported by Andersen and Lundqvist (2019) and by Naeije et al. (2018).

385 To summarize, the current findings provide evidence that the cerebellum, together with the  
386 putamen and thalamus, tracks the timing of upcoming stimulation, as reflected by beta band power.  
387 This fits the interpretation of the beta band as predicting the *when* of upcoming stimulation (Arnal  
388 and Giraud, 2012), and supports the notion of the cerebellum as a clock that keeps track of  
389 upcoming stimulation. Cortical structures such as the SI, SII and the inferior parietal cortex are also  
390 timed relative to the upcoming stimulation. However, the SI and the inferior parietal cortex seem to  
391 be downregulating before the expected stimulus, and SII activates after the omitted stimulus,  
392 possibly reflecting an updating of the current state of affairs. Notably, the omission-related SII  
393 difference is strongest in the right hemisphere, mirroring the evoked difference found by Andersen  
394 and Lundqvist (2019).

## 395 4.2 Encoding of expectations (theta band)

396 We furthermore found in the theta band that the cerebellum reacted more strongly to the first  
 397 stimulation of a train compared to the subsequent stimulation around 280 ms after stimulation onset.  
 398 This may reflect the unexpected nature of the first stimulation compared to the subsequent  
 399 stimulation. This is similar to what has been found using electrical stimulation (Tesche and Karhu,  
 400 2000; see also: Naeije et al., 2018), but opposite to what has been found using tactile stimulation  
 401 (Andersen and Lundqvist, 2019). Future studies will have to tell whether this difference is  
 402 dependent on the type of stimulation. Similarly to the omission contrast, cortical areas, i.e. SI, SII,  
 403 and inferior parietal cortex, and non-cortical areas, i.e., cerebellum, putamen and thalamus, were  
 404 found to differ in activation between the first and the subsequent stimulation (Fig. 6). Except for the  
 405 cerebellum, all contrasts peaked around 145 ms (Fig. 3F), whereas cerebellum peaked later, around  
 406 285 ms (Fig. 3E). All the cortical areas were expressed most strongly on the contralateral side of  
 407 the stimulation as expected. The difference found for the SII is likely to be the same activity caught  
 408 by the evoked analysis (Fig. 1C), as the evoked response is in the theta range. The later cerebellar  
 409 activations are potentially an updating of the new state of affairs (Engel and Fries, 2010), i.e., that  
 410 the stimulation train has been interrupted.

## 411 4.3 Cerebellum's role in forming expectations

412 The current study reveals that cerebellum (along with its potential network members, thalamus  
 413 and putamen (Bostan and Strick, 2018)) was the only area that peaked around 0 ms when  
 414 comparing omissions (Fig. 5). We interpret this as the cerebellum clocking that stimuli arrive as  
 415 expected, possibly in unison with the putamen and the thalamus. This clocking activity is expressed  
 416 in the beta band. Similar clocking activity has been revealed in the auditory domain for the beta  
 417 band (Arnal and Giraud, 2012; Fujioka et al., 2012; Ruiz et al., 2017).

418 We also found cerebellar activity in the theta band when comparing the first stimulation to the  
 419 subsequent stimulation. In contrast to the beta band activity, the theta cerebellar activity was unique  
 420 in peaking later (~285 ms) than the first stimulation related activations (~145 ms) (Fig. 6). We  
 421 interpret this as the cerebellum updating its clock for subsequent stimulation. Of note is also that, in  
 422 contrast to the omission-related beta band activity, the putamen and the thalamus peak out of sync  
 423 with the cerebellum. Our findings are similar to recent findings (Dave et al., 2020), where  
 424 transcranial magnetic stimulation was used to knock out cerebellar theta and cerebellar beta  
 425 respectively. Cerebellar theta was found to be related to encoding episodic memories and cerebellar  
 426 beta was found to be related to semantic predictions related to those memories. We can thus  
 427 interpret our current findings as cerebellar theta setting the clock and cerebellar beta checking  
 428 whether the clock is set correctly.

## 429 4.4 Control analyses

430 An alternative explanation for why we found differences in cerebellar activity when comparing  
 431 omissions following regular and irregular trains of stimulation may be that the proposed cerebellar  
 432 clock is based on local timelocking rather than global timelocking. By global timelocking, we mean  
 433 that the timing of the expected, but omitted, stimulus is set to 8,922 ms (six times the ISI (1,487  
 434 ms)) after the first stimulation of the train (Fig. 1). By local timelocking, we mean that the timing of  
 435 expected, but omitted, stimulus is set to the temporal distance between the fifth and sixth

stimulation, whatever that may be in each particular stimulation train. Using local timelocking, we were also able to reject the null hypothesis ( $p_{\text{BIGGEST\_CLUSTER}} = 0.0029$ ), and we found similar activations of the cerebellum and the putamen (Supplementary Fig. 3). We also used mean timelocking, where we calculated mean distance between the last three stimulations (Fig. 1). Using mean timelocking, we found similar activations of the cerebellum and the putamen (Supplementary Fig. 4) ( $p_{\text{BIGGEST\_CLUSTER}} = 0.0049$ ). The way we timelocked the data in the main analysis (Fig. 4) thus does not change the results significantly.

It is also possible that the contributions of the gradient could not be filtered by the beamformer. We therefore re-ran the beamformer analysis on data where the signal space projections had been applied. This again resulted in very similar results (*Omission 0* vs. *Omission 15*;  $p_{\text{BIGGEST\_CLUSTER}} = 0.0049$ ; Supplementary Fig. 5).

## 5 Conclusion

In conclusion we find that the cerebellum predicts the timing of prospective somatosensory stimuli, functioning like a clock. This is evidenced by cerebellar beta-band power increasing and subsequently decreasing around the expected timing of stimulation, when stimuli are perfectly predictable, whereas when stimuli are less than perfectly predictable, cerebellar beta-band power decreases around the expected time of stimulation, indicating that cerebellar beta band activity is related to prediction. This decrease is suggestive evidence of the clock tracking the uncertainty range of the expected upcoming stimulation, but further studies are needed for ascertaining that the range is also encoded. Also of note, we found evidence of cerebellar theta-band activity potentially encoding memories on which the subsequent predictions can be based. We interpret this as cerebellar theta activity reflecting setting the proposed cerebellar clock and the cerebellar beta activity reflecting checking the prediction of the clock.

Furthermore, we find intriguing evidence of putamen and thalamus activation, tracking the timing of somatosensory stimuli as well. This fits well with knowledge from other domains, such as functional magnetic resonance imaging. However, given the low sensitivity of magnetoencephalography to the putamen and the thalamus, further research is warranted.

## 6 Acknowledgements

We thank Daniel Lundqvist for providing the lab equipment at the National Facility for Magnetoencephalography (NatMEG) at Karolinska Institutet for the very first pilots. We thank Johannes Singer, who was invaluable in designing and analysing pilot data, leading to the final design. Furthermore, we thank Sigbjørn Hokland and Marie-Louise Holm Møller for their help with data collection. Lau Møller Andersen was funded by the Carlsberg Foundation (CF18-0843) and by the Aarhus University Research Foundation (AUFF-E-2019-9-20). Sarang Dalal was funded by an European Research Council Starting Grant (640448).

## 7 References

- Allen, M., Fardo, F., Dietz, M.J., Hillebrandt, H., Friston, K.J., Rees, G., Roepstorff, A., 2016. Anterior insula coordinates hierarchical processing of tactile mismatch responses. *NeuroImage* 127, 34–43. <https://doi.org/10.1016/j.neuroimage.2015.11.030>



- Andersen, L.M., Jerbi, K., Dalal, S.S., 2020. Can EEG and MEG detect signals from the human cerebellum? *NeuroImage* 215, 116817. <https://doi.org/10.1016/j.neuroimage.2020.116817>
- Andersen, L.M., Lundqvist, D., 2019. Somatosensory responses to nothing: An MEG study of expectations during omission of tactile stimulations. *NeuroImage* 184, 78–89. <https://doi.org/10.1016/j.neuroimage.2018.09.014>
- Arnal, L.H., Giraud, A.-L., 2012. Cortical oscillations and sensory predictions. *Trends Cogn. Sci.* 16, 390–398. <https://doi.org/10.1016/j.tics.2012.05.003>
- Attal, Y., Maess, B., Friederici, A., David, O., 2012. Head models and dynamic causal modeling of subcortical activity using magnetoencephalographic/electroencephalographic data. *Rev. Neurosci.* 23, 85–95. <https://doi.org/10.1515/rns.2011.056>
- Attal, Y., Schwartz, D., 2013. Assessment of Subcortical Source Localization Using Deep Brain Activity Imaging Model with Minimum Norm Operators: A MEG Study. *PLOS ONE* 8, e59856. <https://doi.org/10.1371/journal.pone.0059856>
- Bostan, A.C., Strick, P.L., 2018. The basal ganglia and the cerebellum: nodes in an integrated network. *Nat. Rev. Neurosci.* 19, 338–350. <https://doi.org/10.1038/s41583-018-0002-7>
- Caligiore, D., Helmich, R.C., Hallett, M., Moustafa, A.A., Timmermann, L., Toni, I., Baldassarre, G., 2016. Parkinson’s disease as a system-level disorder. *Npj Park. Dis.* 2, 1–9. <https://doi.org/10.1038/npjparkd.2016.25>
- Dale, A.M., Fischl, B., Sereno, M.I., 1999. Cortical surface-based analysis. I. Segmentation and surface reconstruction. *NeuroImage* 9, 179–94. <https://doi.org/10.1006/nimg.1998.0395>
- Dave, S., VanHaerents, S., Voss, J.L., 2020. Cerebellar theta and beta noninvasive stimulation rhythms differentially influence episodic memory versus semantic prediction. *J. Neurosci.* <https://doi.org/10.1523/JNEUROSCI.0595-20.2020>
- Desikan, R.S., Ségonne, F., Fischl, B., Quinn, B.T., Dickerson, B.C., Blacker, D., Buckner, R.L., Dale, A.M., Maguire, R.P., Hyman, B.T., Albert, M.S., Killiany, R.J., 2006. An automated labeling system for subdividing the human cerebral cortex on MRI scans into gyral based regions of interest. *NeuroImage* 31, 968–980. <https://doi.org/10.1016/j.neuroimage.2006.01.021>
- Engel, A.K., Fries, P., 2010. Beta-band oscillations—signalling the status quo? *Curr. Opin. Neurobiol., Cognitive neuroscience* 20, 156–165. <https://doi.org/10.1016/j.conb.2010.02.015>
- Fardo, F., Aukstulewicz, R., Allen, M., Dietz, M.J., Roepstorff, A., Friston, K.J., 2017. Expectation violation and attention to pain jointly modulate neural gain in somatosensory cortex. *NeuroImage* 153, 109–121. <https://doi.org/10.1016/j.neuroimage.2017.03.041>
- Fischl, B., Sereno, M.I., Dale, A.M., 1999. Cortical Surface-Based Analysis: II: Inflation, Flattening, and a Surface-Based Coordinate System. *NeuroImage* 9, 195–207. <https://doi.org/10.1006/nimg.1998.0396>
- Fujioka, T., Trainor, L.J., Large, E.W., Ross, B., 2012. Internalized Timing of Isochronous Sounds Is Represented in Neuromagnetic Beta Oscillations. *J. Neurosci.* 32, 1791–1802. <https://doi.org/10.1523/JNEUROSCI.4107-11.2012>
- Fujioka, T., Trainor, L.J., Large, E.W., Ross, B., 2009. Beta and Gamma Rhythms in Human Auditory Cortex during Musical Beat Processing. *Ann. N. Y. Acad. Sci.* 1169, 89–92. <https://doi.org/10.1111/j.1749-6632.2009.04779.x>
- Garrido, M.I., Barnes, G.R., Kumaran, D., Maguire, E.A., Dolan, R.J., 2015. Ventromedial prefrontal cortex drives hippocampal theta oscillations induced by mismatch computations. *NeuroImage* 120, 362–370. <https://doi.org/10.1016/j.neuroimage.2015.07.016>
- Gibbon, J., Malapani, C., Dale, C.L., Gallistel, C.R., 1997. Toward a neurobiology of temporal cognition: advances and challenges. *Curr. Opin. Neurobiol.* 7, 170–184. [https://doi.org/10.1016/S0959-4388\(97\)80005-0](https://doi.org/10.1016/S0959-4388(97)80005-0)
- Gramfort, a., Luessi, M., Larson, E., Engemann, D., Strohmeier, D., Brodbeck, C., Parkkonen, L., Hämäläinen, M., 2013. MNE software for processing MEG and EEG data. *NeuroImage.* <https://doi.org/10.1016/j.neuroimage.2013.10.027>

- Gross, J., Kujala, J., Hämäläinen, M., Timmermann, L., Schnitzler, A., Salmelin, R., 2001. Dynamic imaging of coherent sources: Studying neural interactions in the human brain. *Proc. Natl. Acad. Sci.* 98, 694–699. <https://doi.org/10.1073/pnas.98.2.694>
- Hari, R., Puce, A., 2017. MEG-EEG Primer. Oxford University Press, New York, NY, US.
- Harrington, D.L., Haaland, K.Y., 1998. Sequencing and timing operations of the basal ganglia, in: Rosenbaum, D.A., Collyer, C.E. (Eds.), *Timing of Behavior*. MIT Press, London, pp. 35–61.
- Hull, C., 2020. Prediction signals in the cerebellum: beyond supervised motor learning. *eLife* 9, e54073. <https://doi.org/10.7554/eLife.54073>
- Joutsiniemi, S.-L., Hari, R., 1989. Omissions of Auditory Stimuli May Activate Frontal Cortex. *Eur. J. Neurosci.* 1, 524–528. <https://doi.org/10.1111/j.1460-9568.1989.tb00359.x>
- King, M., Hernandez-Castillo, C.R., Poldrack, R.A., Ivry, R.B., Diedrichsen, J., 2019. Functional boundaries in the human cerebellum revealed by a multi-domain task battery. *Nat. Neurosci.* 1. <https://doi.org/10.1038/s41593-019-0436-x>
- Kuhlman, W.N., 1978. Functional topography of the human mu rhythm. *Electroencephalogr. Clin. Neurophysiol.* 44, 83–93. [https://doi.org/10.1016/0013-4694\(78\)90107-4](https://doi.org/10.1016/0013-4694(78)90107-4)
- Lorente de Nó, R., 1947. Action potential of the motoneurons of the hypoglossus nucleus. *J. Cell. Comp. Physiol.* 29, 207–287. <https://doi.org/10.1002/jcp.1030290303>
- Maris, E., Oostenveld, R., 2007. Nonparametric statistical testing of EEG- and MEG-data. *J. Neurosci. Methods* 164, 177–190.
- Naeije, G., Vaulet, T., Wens, V., Marty, B., Goldman, S., Tiège, X.D., 2018. Neural Basis of Early Somatosensory Change Detection: A Magnetoencephalography Study. *Brain Topogr.* 31, 242–256. <https://doi.org/10.1007/s10548-017-0591-x>
- Pizzo, F., Roehri, N., Villalon, S.M., Trébuchon, A., Chen, S., Lagarde, S., Carron, R., Gavaret, M., Giusiano, B., McGonigal, A., Bartolomei, F., Badier, J.M., Bénar, C.G., 2019. Deep brain activities can be detected with magnetoencephalography. *Nat. Commun.* 10, 971. <https://doi.org/10.1038/s41467-019-08665-5>
- Ruiz, M.H., Maess, B., Altenmüller, E., Curio, G., Nikulin, V.V., 2017. Cingulate and cerebellar beta oscillations are engaged in the acquisition of auditory-motor sequences. *Hum. Brain Mapp.* 38, 5161–5179. <https://doi.org/10.1002/hbm.23722>
- Ruzich, E., Crespo-García, M., Dalal, S.S., Schneiderman, J.F., 2019. Characterizing hippocampal dynamics with MEG: A systematic review and evidence-based guidelines. *Hum. Brain Mapp.* 40, 1353–1375. <https://doi.org/10.1002/hbm.24445>
- Samuelsson, J.G., Sundaram, P., Khan, S., Sereno, M.I., Hämäläinen, M.S., 2020. Detectability of cerebellar activity with magnetoencephalography and electroencephalography. *Hum. Brain Mapp.* <https://doi.org/10.1002/hbm.24951>
- Schmahmann, J.D., 1997. Rediscovery of an Early Concept, in: Bradley, R.J., Harris, R.A., Jenner, P., Schmahmann, J.D. (Eds.), *International Review of Neurobiology*. Academic Press, pp. 3–27. [https://doi.org/10.1016/S0074-7742\(08\)60345-1](https://doi.org/10.1016/S0074-7742(08)60345-1)
- Sekihara, K., Nagarajan, S.S., 2008. *Adaptive Spatial Filters for Electromagnetic Brain Imaging*. Springer Science & Business Media.
- Sereno, M.I., Diedrichsen, J., Tachrount, M., Testa-Silva, G., d’Arceuil, H., Zeeuw, C.D., 2020. The human cerebellum has almost 80% of the surface area of the neocortex. *Proc. Natl. Acad. Sci.* <https://doi.org/10.1073/pnas.2002896117>
- Teghil, A., Boccia, M., D’Antonio, F., Di Vita, A., de Lena, C., Guariglia, C., 2019. Neural substrates of internally-based and externally-cued timing: An activation likelihood estimation (ALE) meta-analysis of fMRI studies. *Neurosci. Biobehav. Rev.* 96, 197–209. <https://doi.org/10.1016/j.neubiorev.2018.10.003>
- Tesche, C.D., Karhu, J.J.T., 2000. Anticipatory cerebellar responses during somatosensory omission in man. *Hum. Brain Mapp.* 9, 119–142. [https://doi.org/10.1002/\(SICI\)1097-0193\(200003\)9:3<119::AID-HBM2>3.0.CO;2-R](https://doi.org/10.1002/(SICI)1097-0193(200003)9:3<119::AID-HBM2>3.0.CO;2-R)



- Tzourio-Mazoyer, N., Landeau, B., Papathanassiou, D., Crivello, F., Etard, O., Delcroix, N., Mazoyer, B., Joliot, M., 2002. Automated Anatomical Labeling of Activations in SPM Using a Macroscopic Anatomical Parcellation of the MNI MRI Single-Subject Brain. *NeuroImage* 15, 273–289. <https://doi.org/10.1006/nimg.2001.0978>
- van Veen, B.D., van Drongelen, W., Yuchtman, M., Suzuki, A., 1997. Localization of brain electrical activity via linearly constrained minimum variance spatial filtering. *IEEE Trans. Biomed. Eng.* 44, 867–880. <https://doi.org/10.1109/10.623056>
- Yabe, H., Tervaniemi, M., Reinikainen, K., Näätänen, R., 1997. Temporal window of integration revealed by MMN to sound omission. *Neuroreport* 8, 1971–1974.

Stimulation

Omission

On-time

Jittered

Steady rhythm

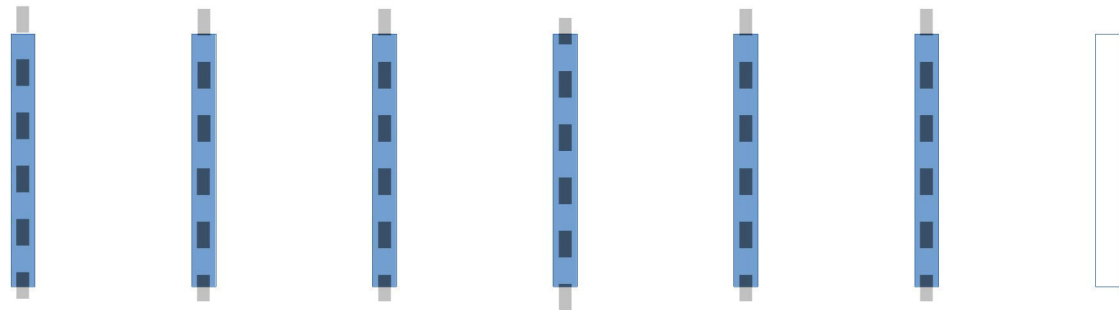

Slightly jittered (5%)

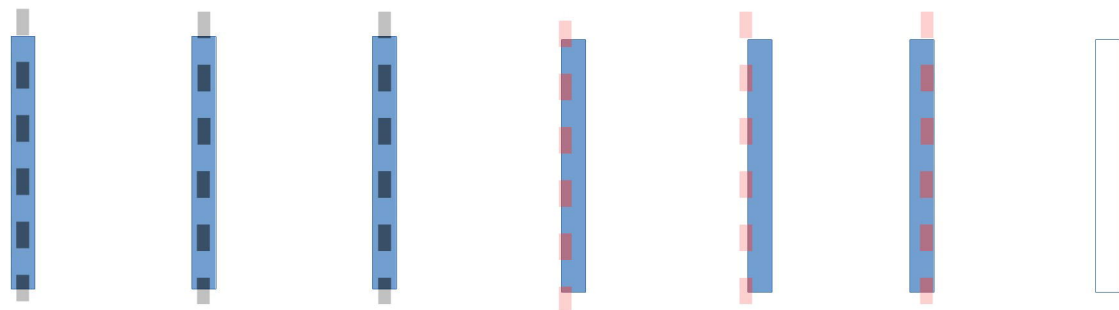

Heavily jittered (15%)

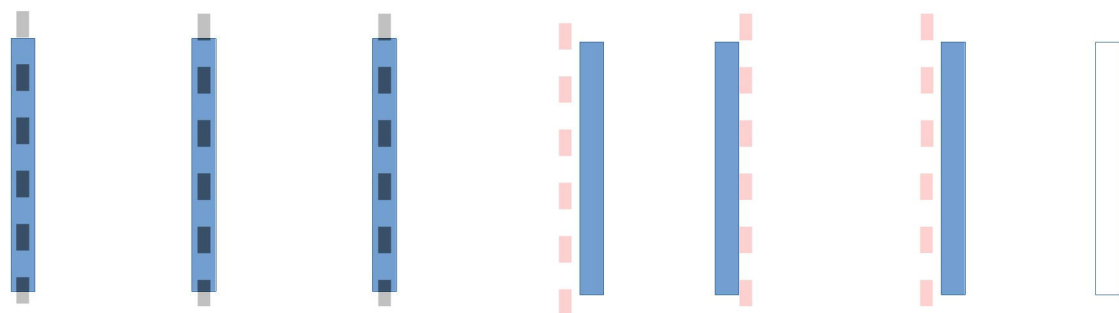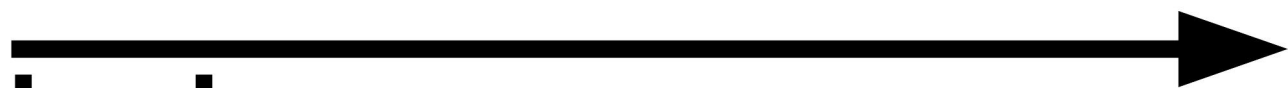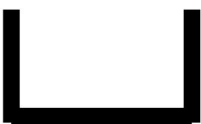

1,487 ms

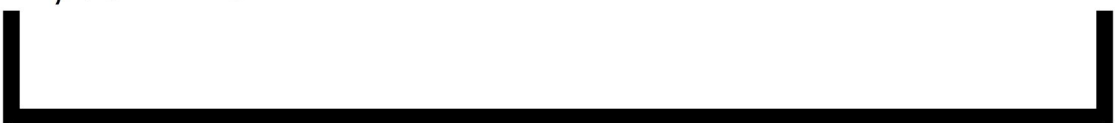

6 x 1,487 ms = 8,922 ms

A

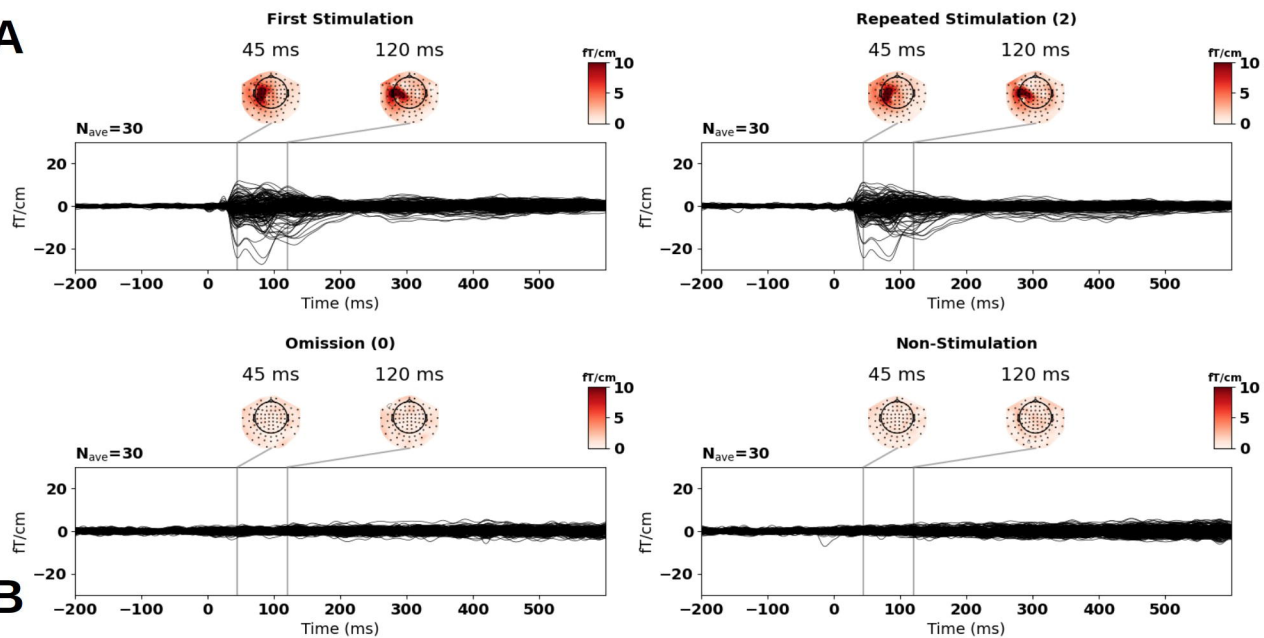

B

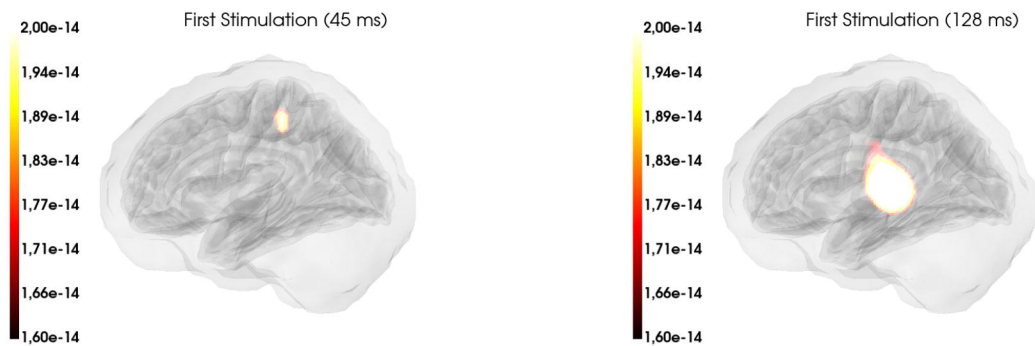

C

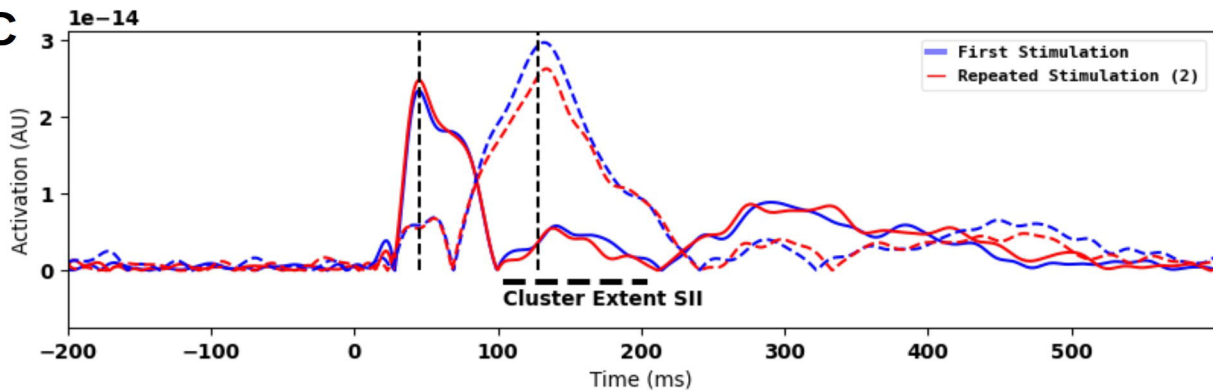

# Theta band (4-7 Hz)

## First Stimulation vs. Repeated Stimulation (2)

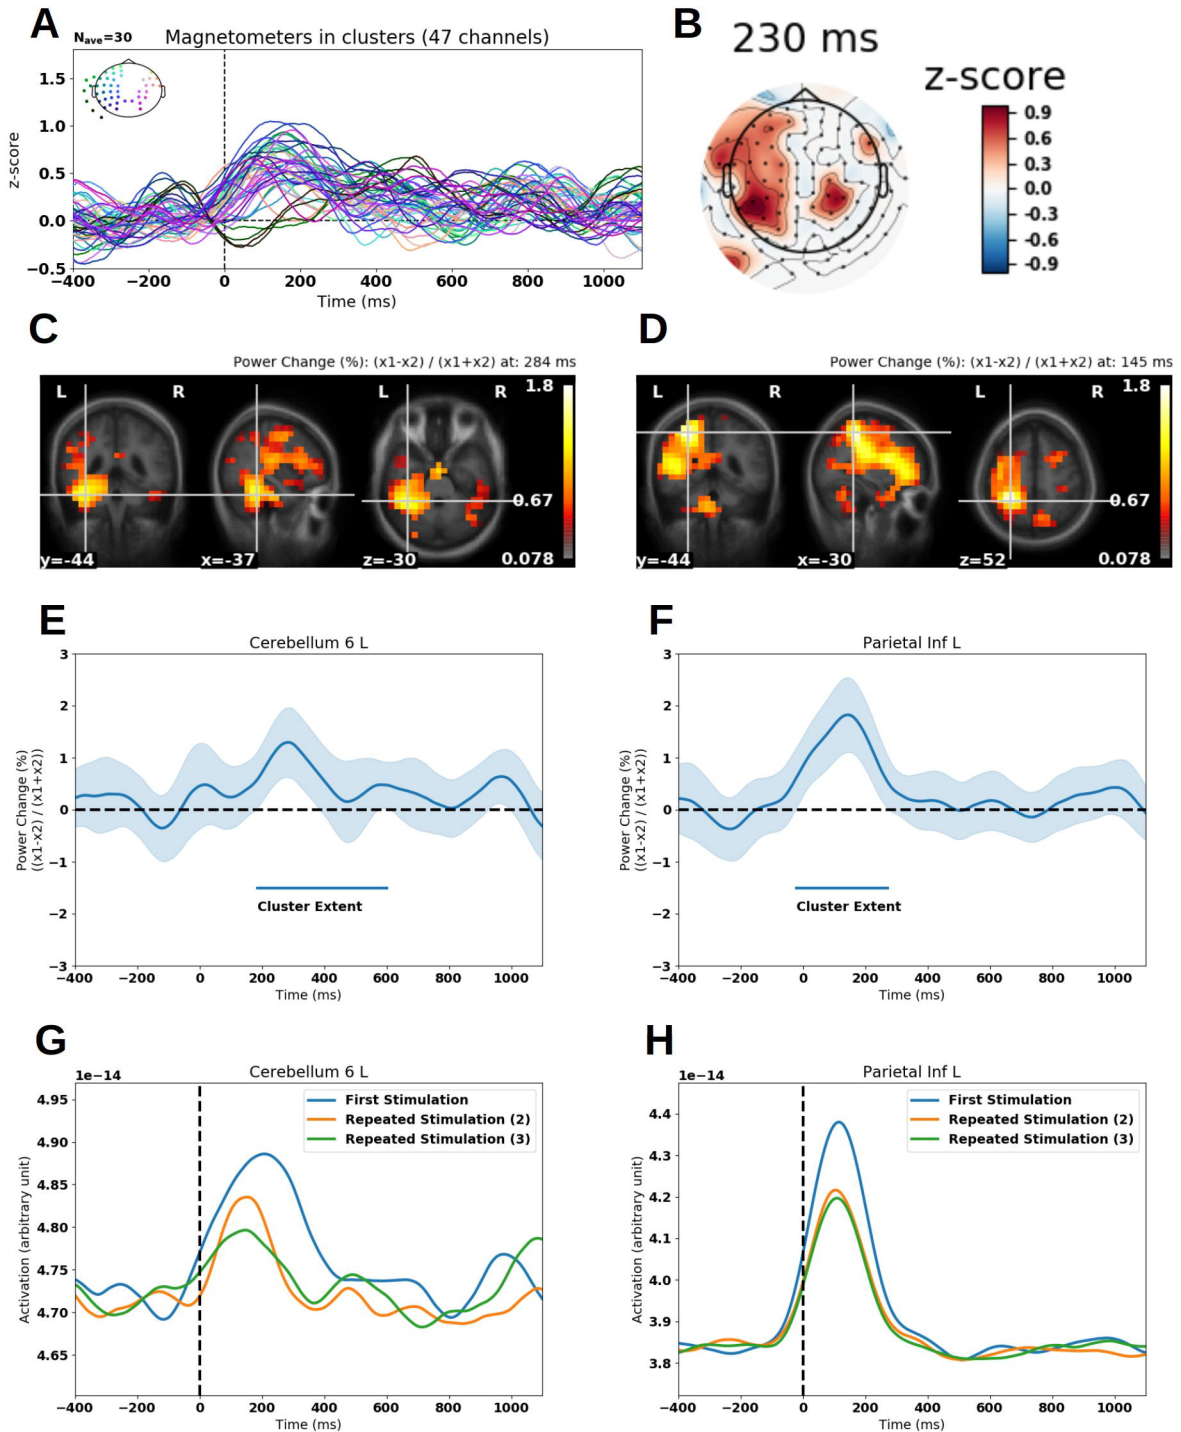

# Beta band (14-30 Hz)

## Omission 0 vs. Omission 15

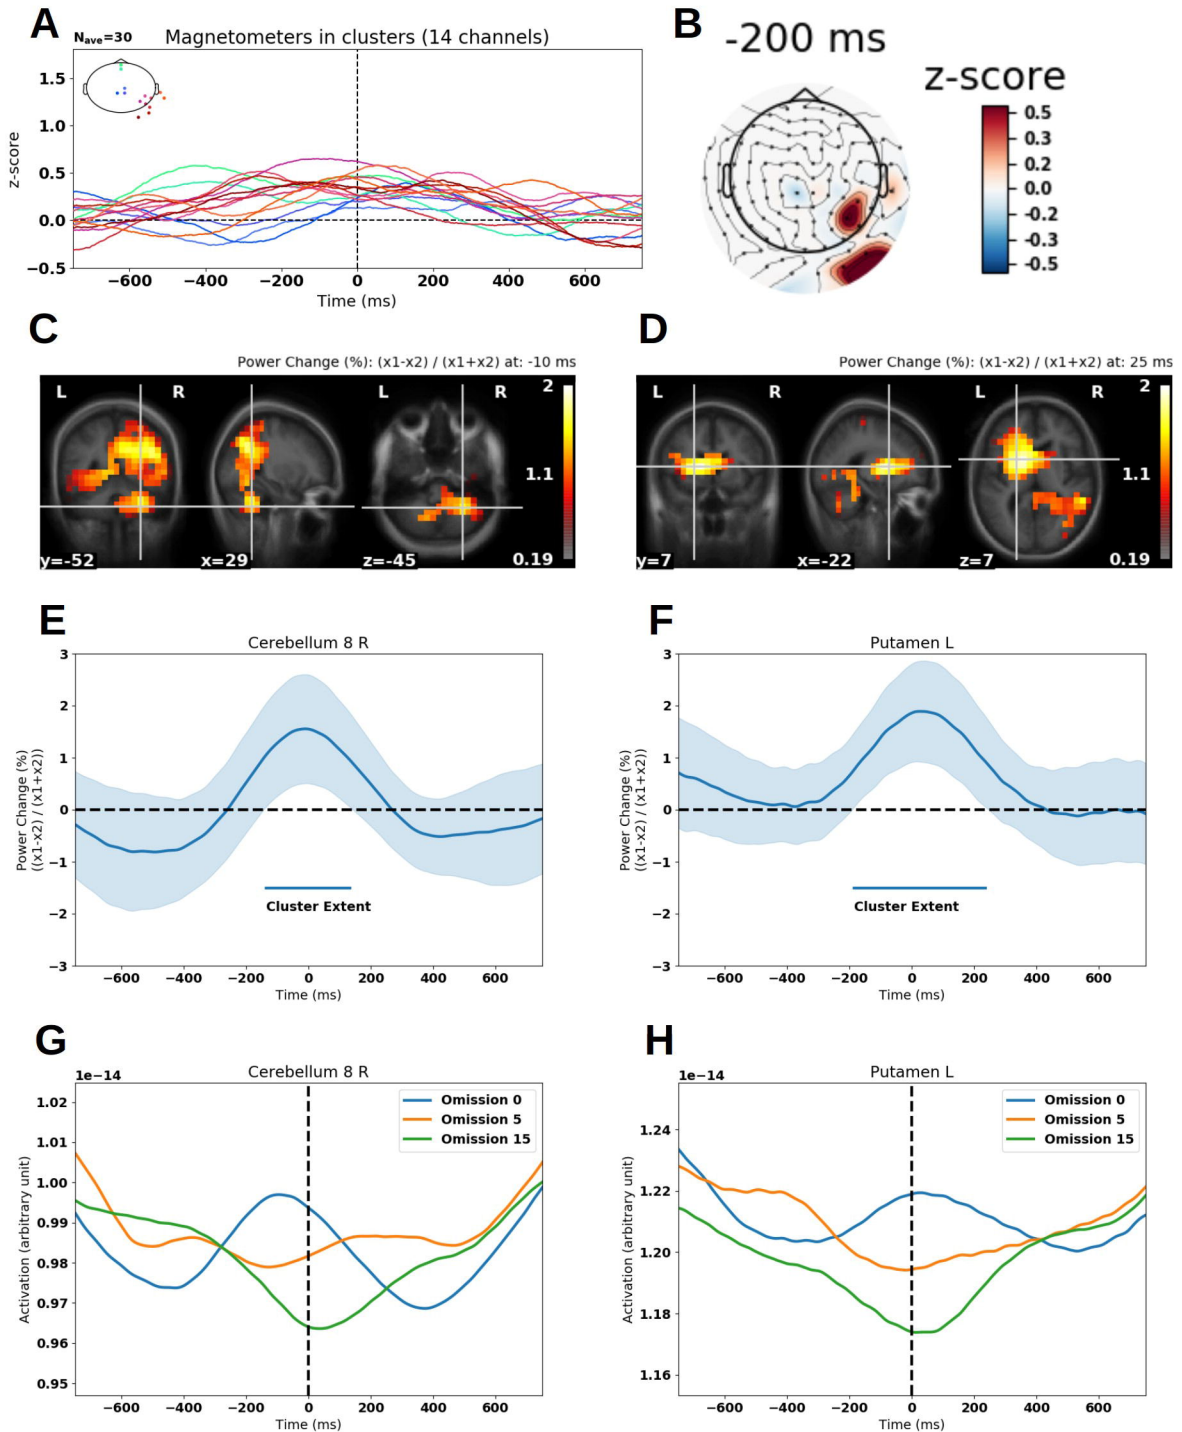

# Beta band (14-30 Hz)

*Omission 0 vs. Omission 15*

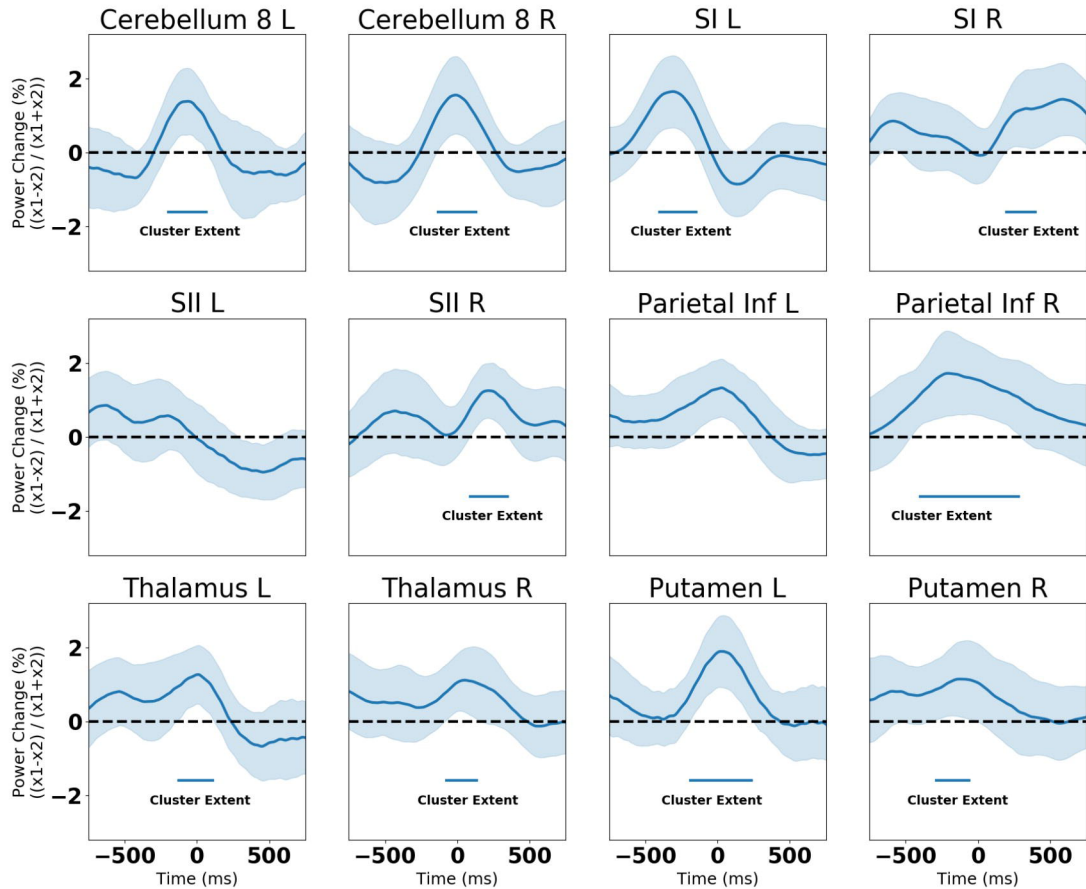

# Theta band (4-7 Hz)

## *First Stimulation vs. Repeated Stimulation (2)*

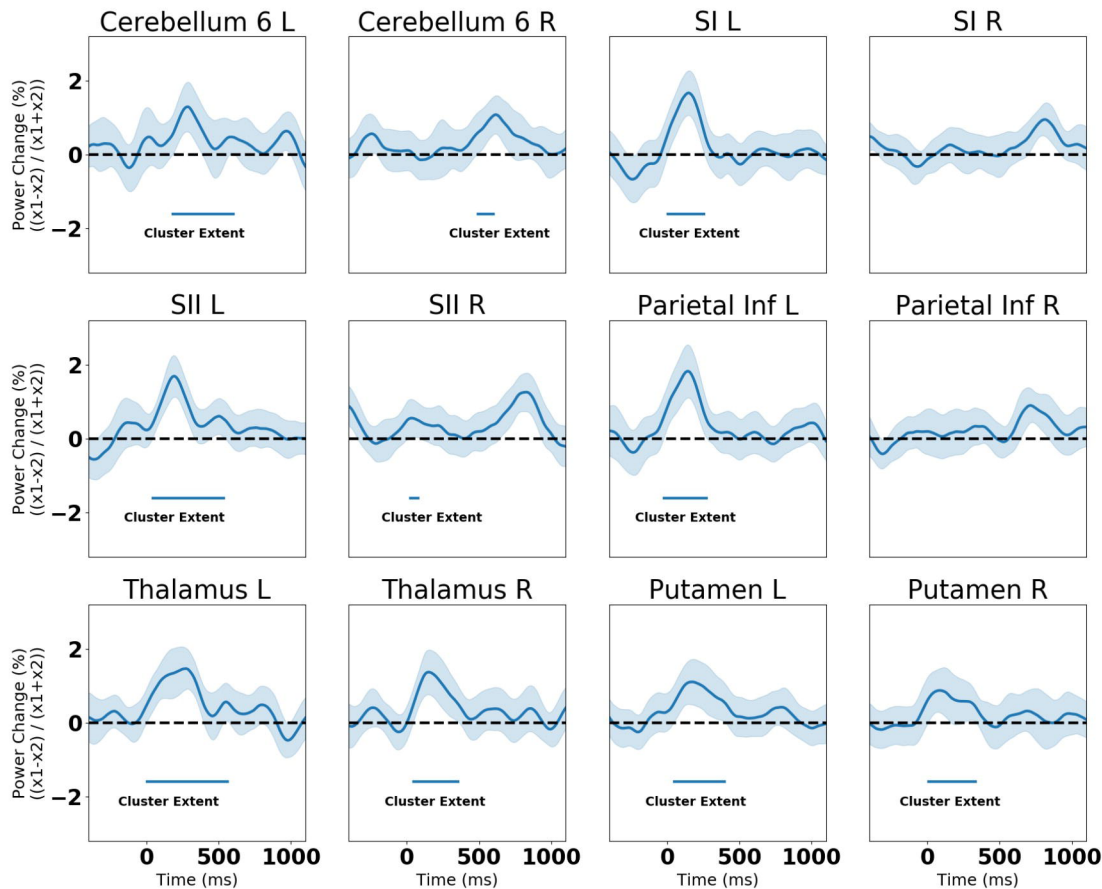

Source: http://biorxiv.org/content/10.1101/2020.10.01.321455v1.full.pdf
